# Supplementary material for: Time-Varying Relation between Oil Shocks and European Stock Market Returns
Source: MDPI journal article supplement (doi:10.3390/jrfm16030174), 2023-03-05
Supplement: s1 [file s1]

# Supplementary Material

## Time-varying relation between oil shocks and European stock market returns\*

César Castro<sup>†1</sup>, Rebeca Jiménez-Rodríguez<sup>‡2</sup> and Renatas Kizys<sup>§3</sup>

<sup>1</sup>Universidad Pública de Navarra

<sup>2</sup>Universidad de Salamanca

<sup>3</sup>University of Southampton

Here we present some results that support the findings reported in the main text, but that we do not submit for publication. As Primiceri (2005) warns, posterior inference may be affected by the choice of  $k_Q$ ,  $k_S$  and  $k_W$ . Thus, as a robustness check, we also compute posterior inference using alternative values for  $k_Q$ ,  $k_S$  and  $k_W$ . Specifically, following Primiceri (2005), we consider all possible combinations of  $k_Q = \{0.01; 0.05; 0.1\}$ ,  $k_S = \{0.05; 0.1; 0.5\}$  and  $k_W = \{0.005; 0.01\}$ . Table C.1 presents the different combinations considered.

We can observe that the results are very similar to those of our baseline specification presented in the main text (case 4 here).

---

\*This work was partially written while Rebeca Jiménez-Rodríguez was visiting King's College London (whose kind hospitality is gratefully acknowledged) under the PRX18/00501 Salvador de Madariaga grant from the Spanish Ministry of Science, Innovation and Universities. This author also acknowledges support from the research grant SA049G19 (Junta de Castilla y León). Moreover, César Castro acknowledges financial support from the Ministerio de Ciencia, Innovación y Universidades (Project No. PID2021-127119NB-I00).

<sup>†</sup>Department of Economics, Universidad Pública de Navarra, Campus Arrosadia. E-31006 Pamplona, Spain

<sup>‡</sup>Department of Economics, University of Salamanca, Campus Miguel de Unamuno E-37007, Salamanca, Spain

<sup>§</sup>Department of Banking and Finance, Southampton Business School, University of Southampton, Highfield, Southampton SO17 1BJ, UK. Email: R.Kizys@soton.ac.uk.

| Table S1: Robustness checks |       |       |       |
|-----------------------------|-------|-------|-------|
| Case                        | $k_Q$ | $k_S$ | $k_W$ |
| 1                           | 0.01  | 0.05  | 0.005 |
| 2                           |       |       | 0.01  |
| 3                           |       | 0.1   | 0.005 |
| 4                           |       |       | 0.01  |
| 5                           |       | 0.5   | 0.005 |
| 6                           |       |       | 0.01  |
| 7                           | 0.05  | 0.05  | 0.005 |
| 8                           |       |       | 0.01  |
| 9                           |       | 0.1   | 0.005 |
| 10                          |       |       | 0.01  |
| 11                          |       | 0.5   | 0.005 |
| 12                          |       |       | 0.01  |
| 13                          | 0.1   | 0.05  | 0.005 |
| 14                          |       |       | 0.01  |
| 15                          |       | 0.1   | 0.005 |
| 16                          |       |       | 0.01  |
| 17                          |       | 0.5   | 0.005 |
| 18                          |       |       | 0.01  |

**Figure S1: Standard deviations of structural shocks**

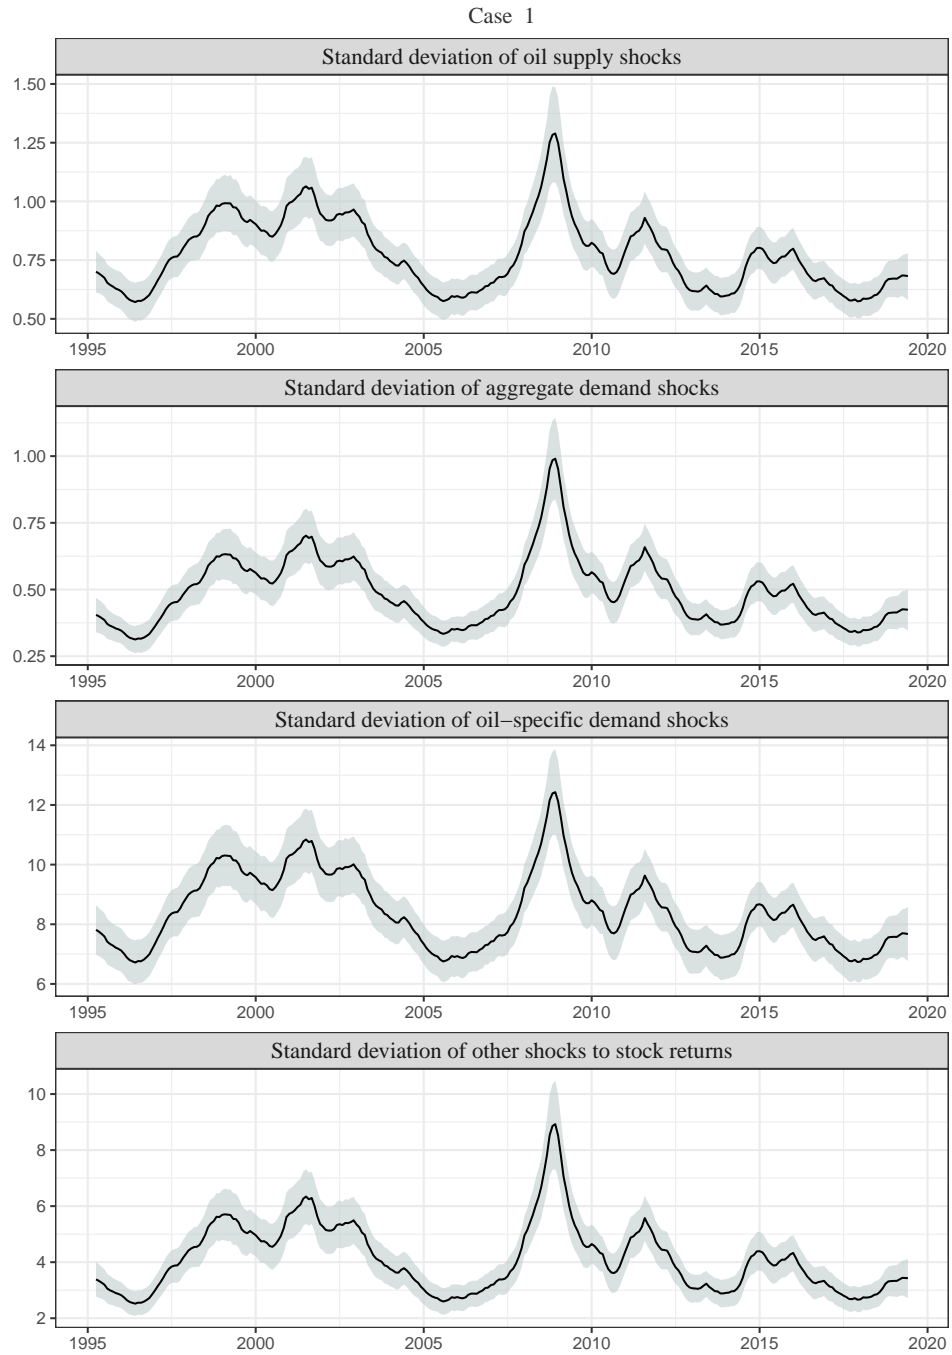

Case 2

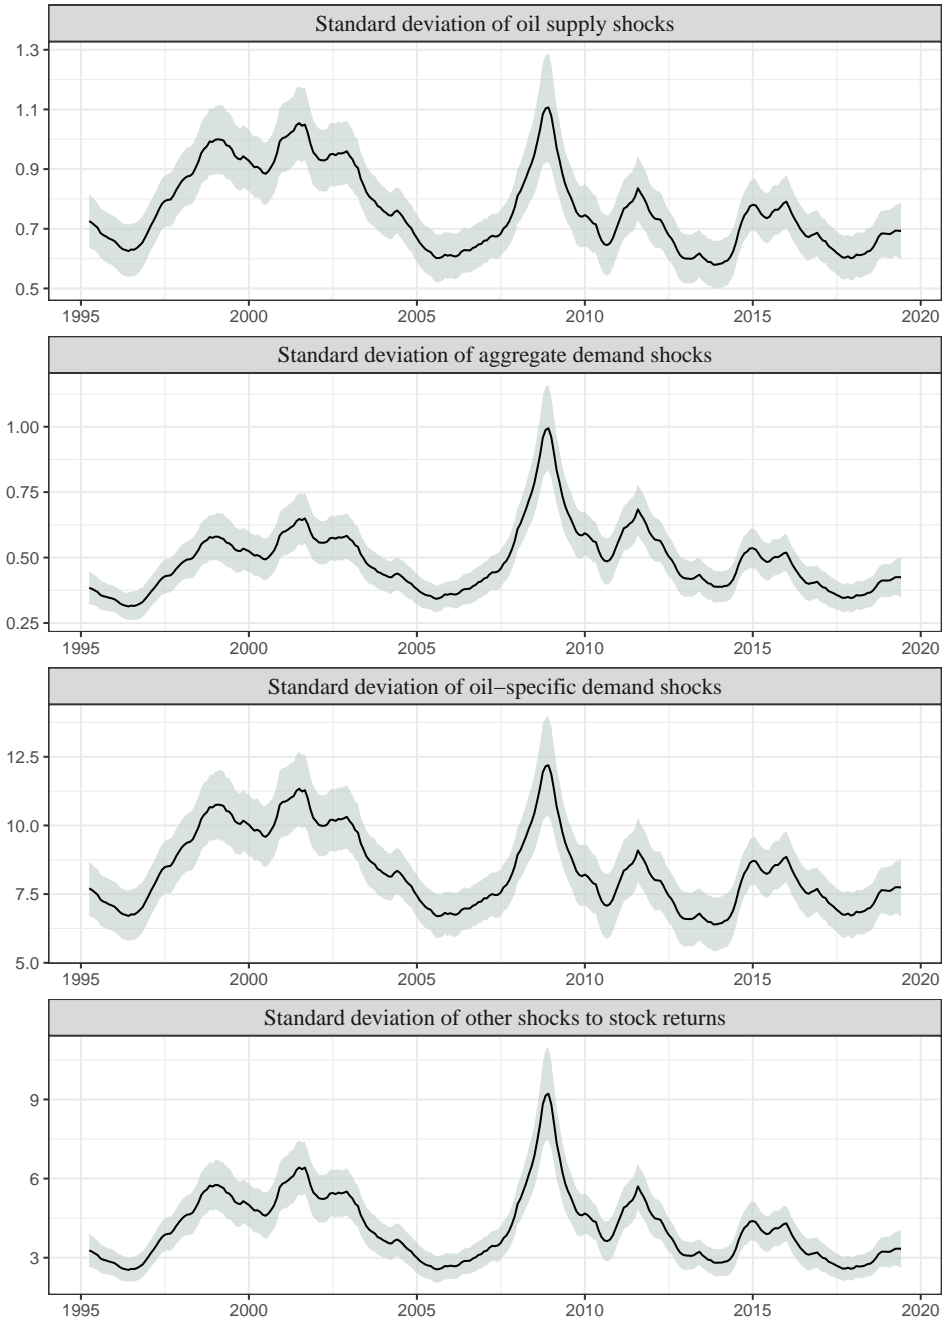

Case 3

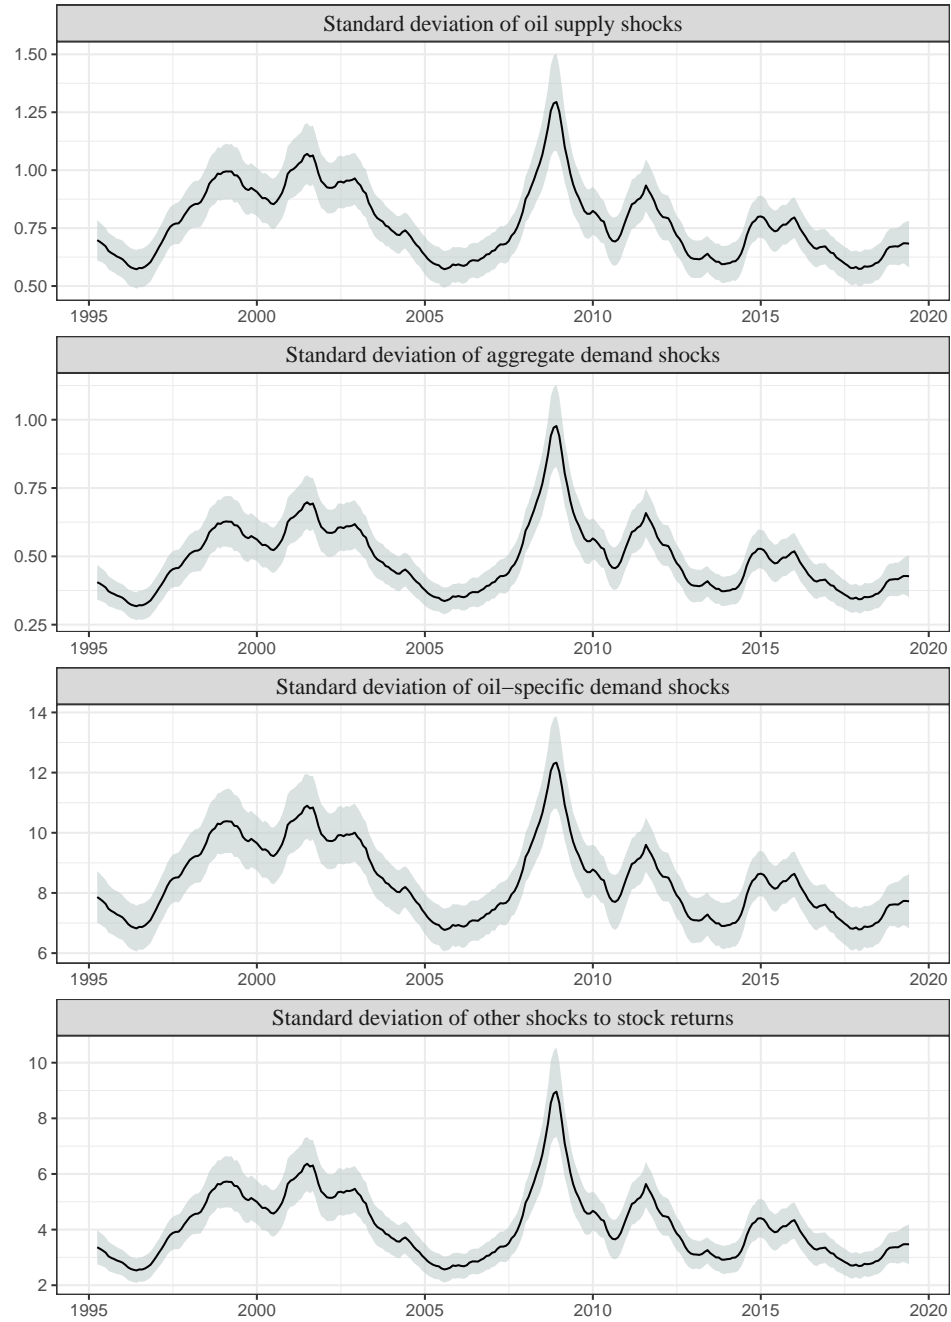

Case 4

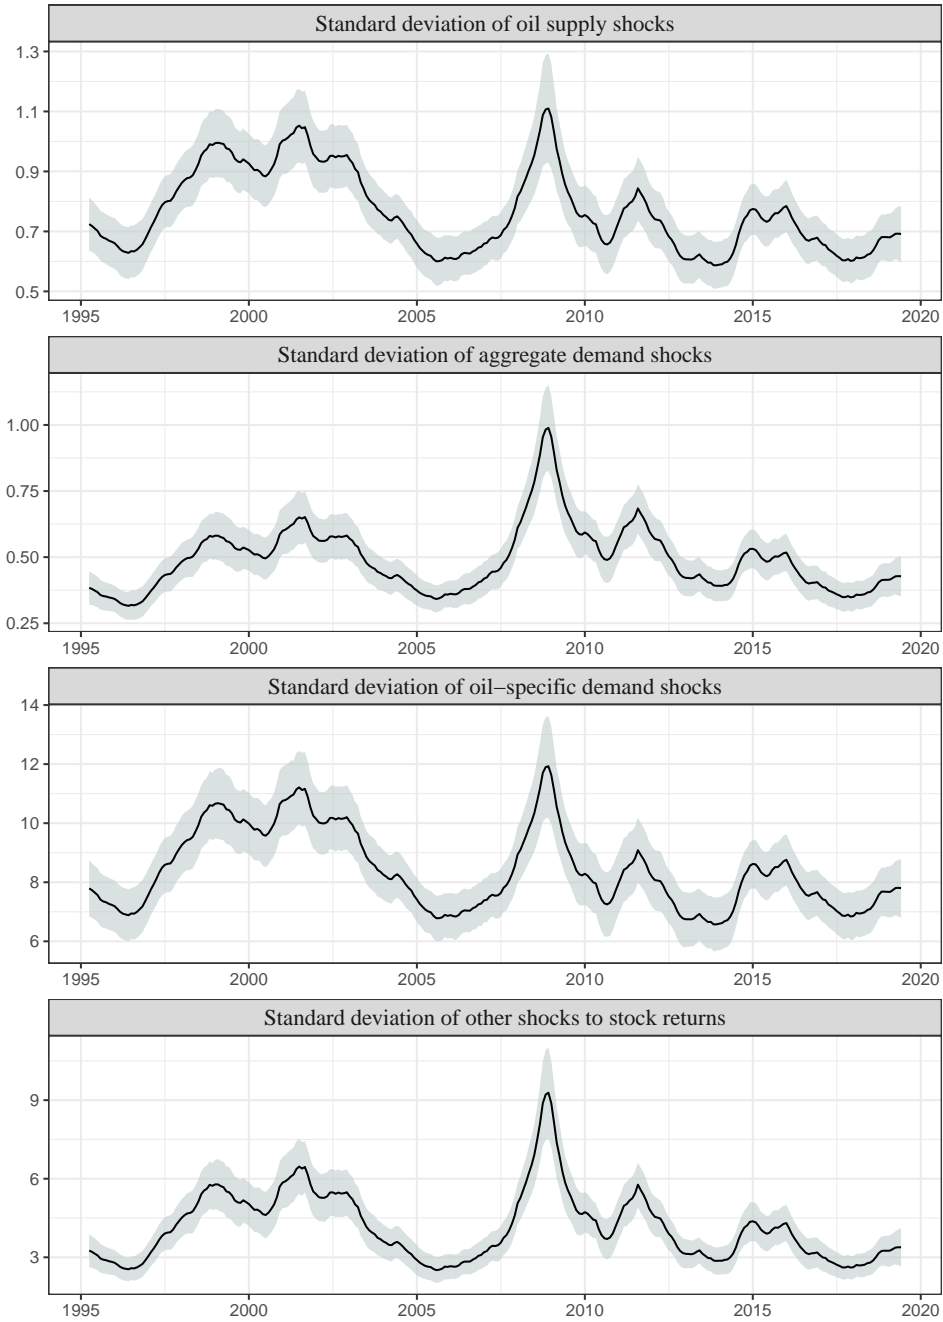

Case 5

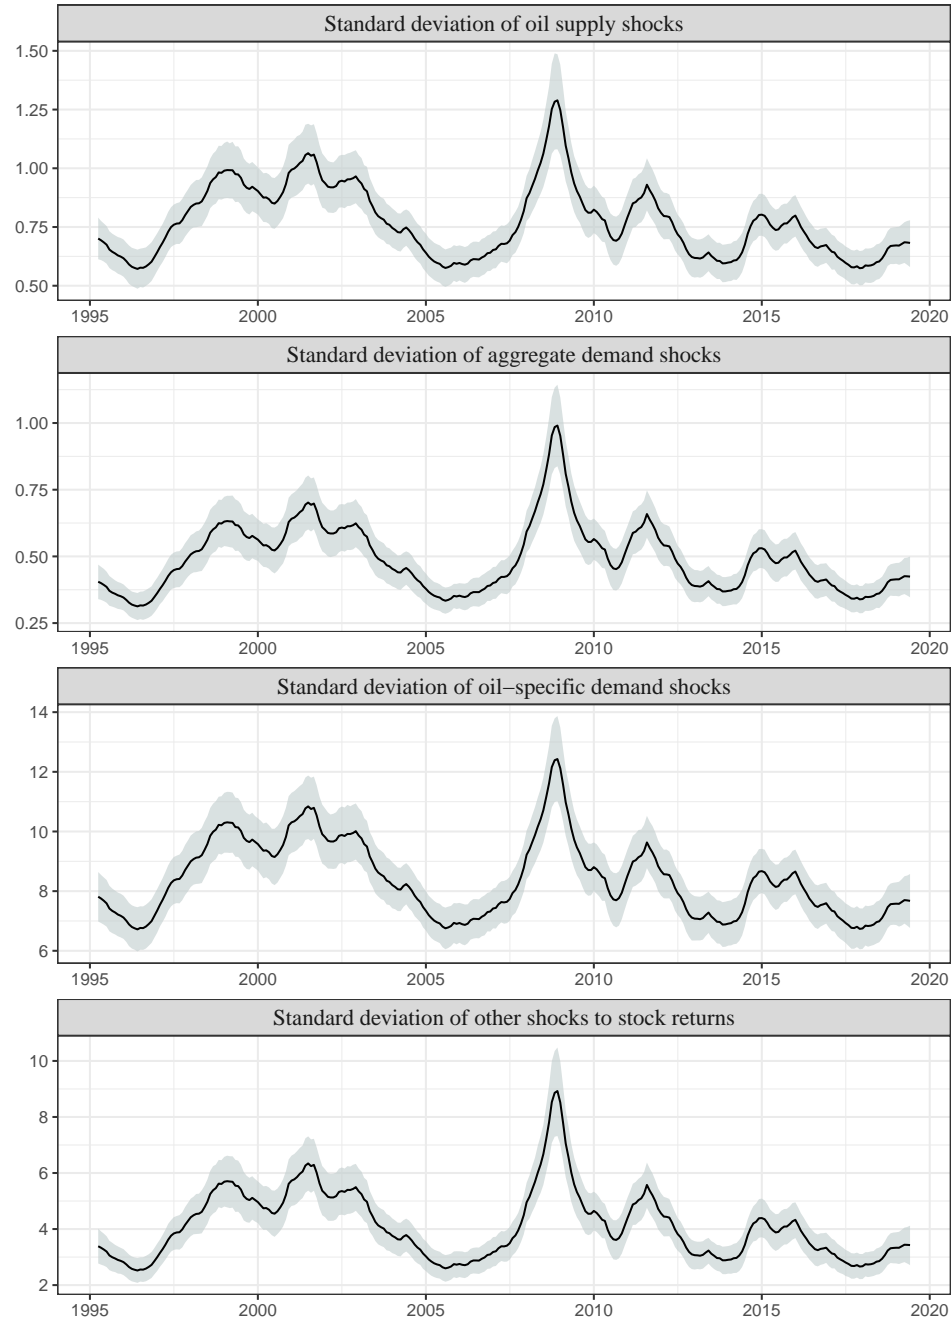

Case 6





Case 7

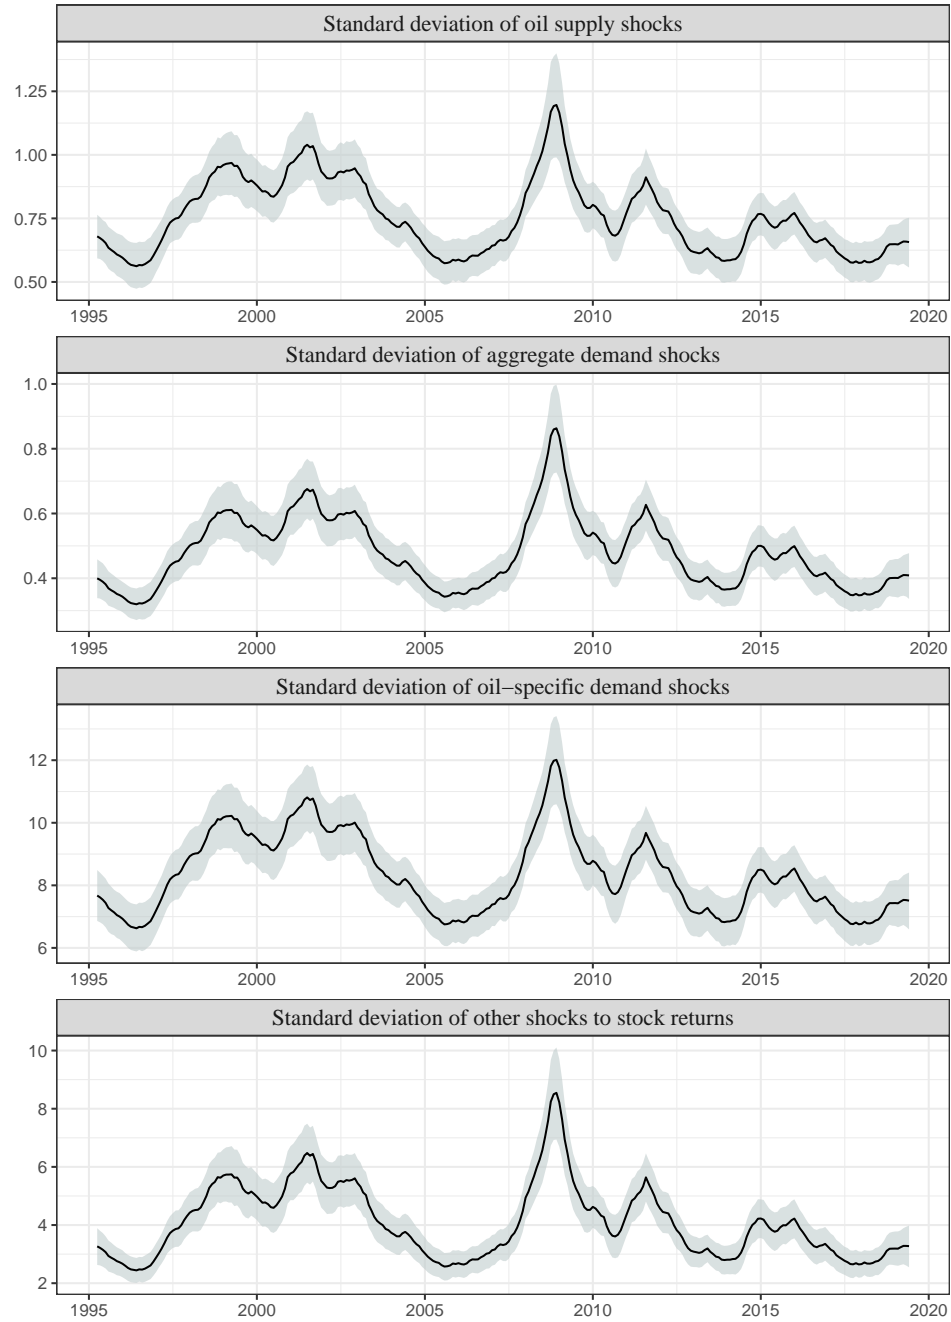

Case 8

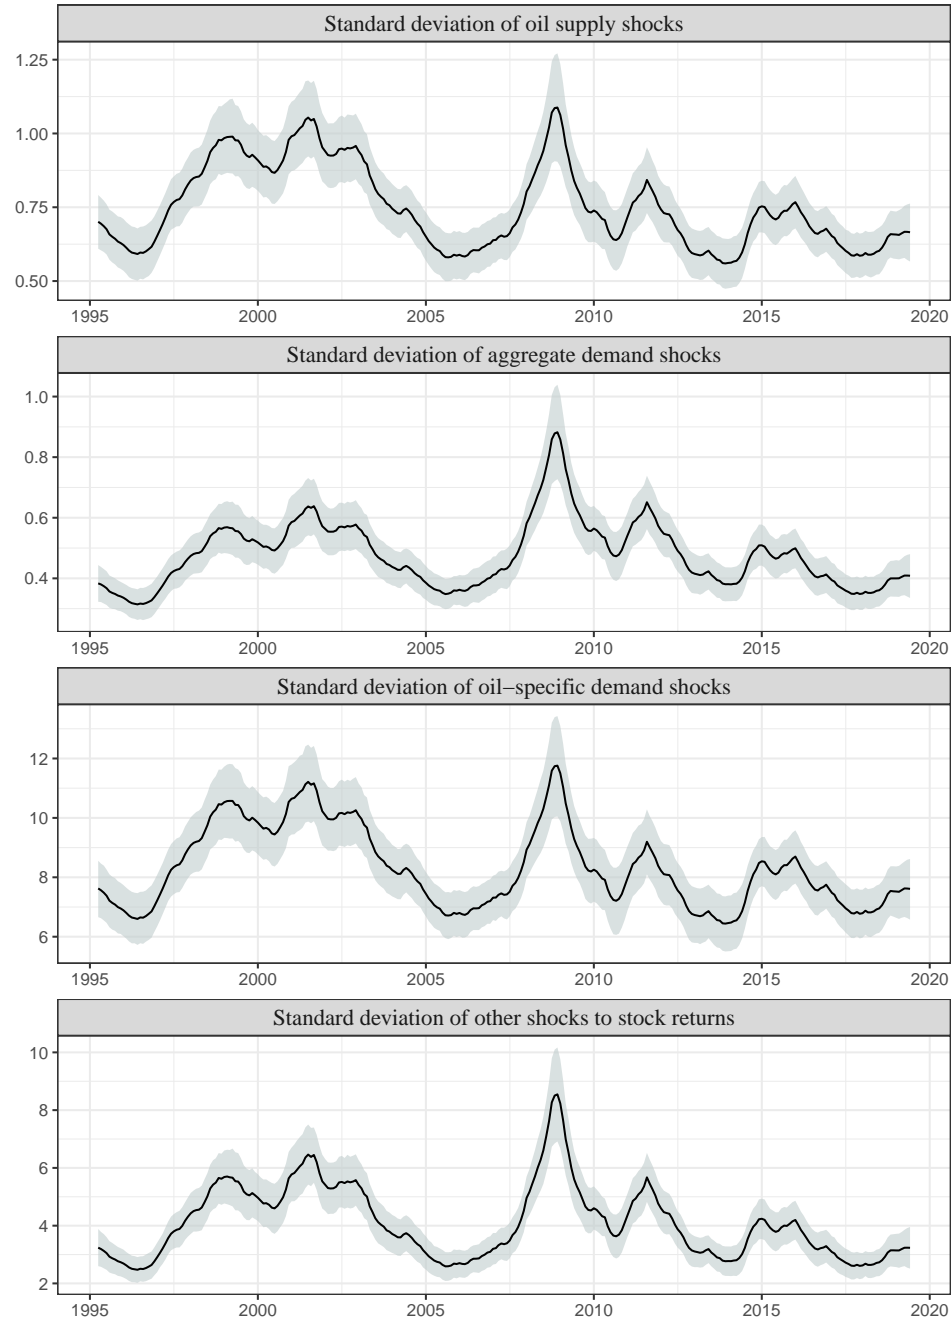

Case 9

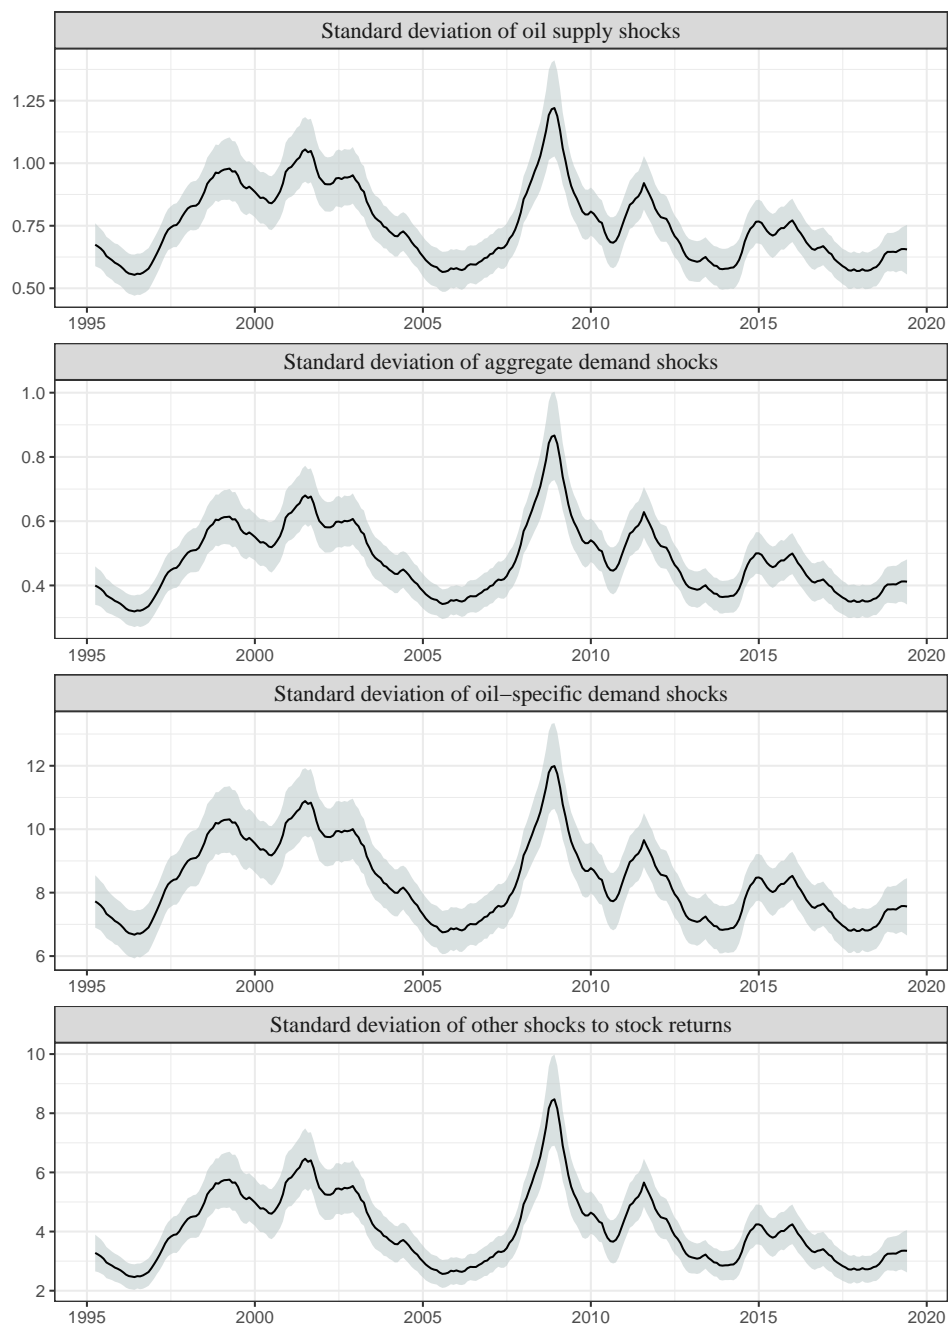

Case 10

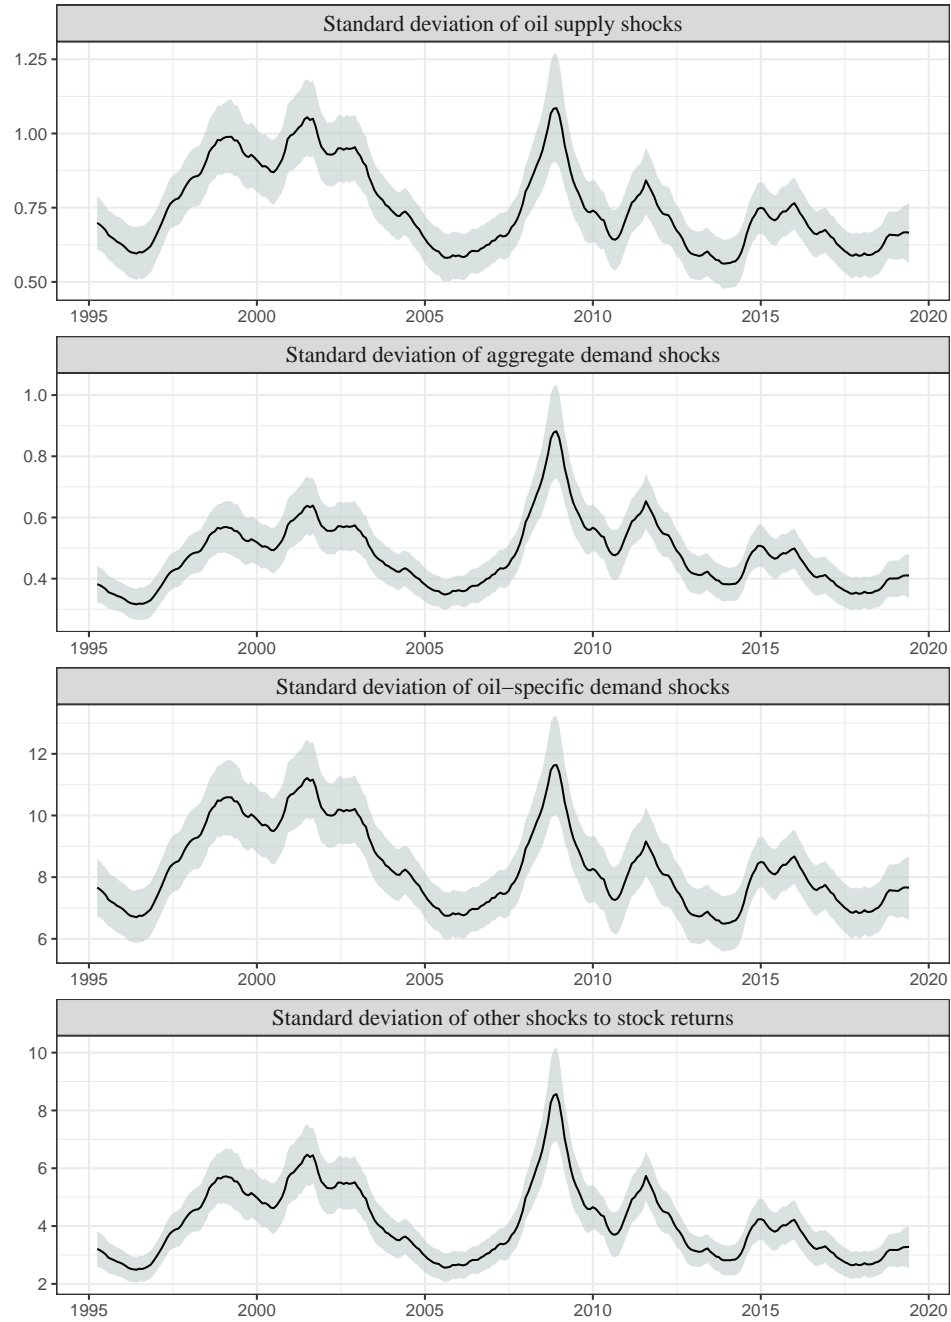

Case 11



Case 12

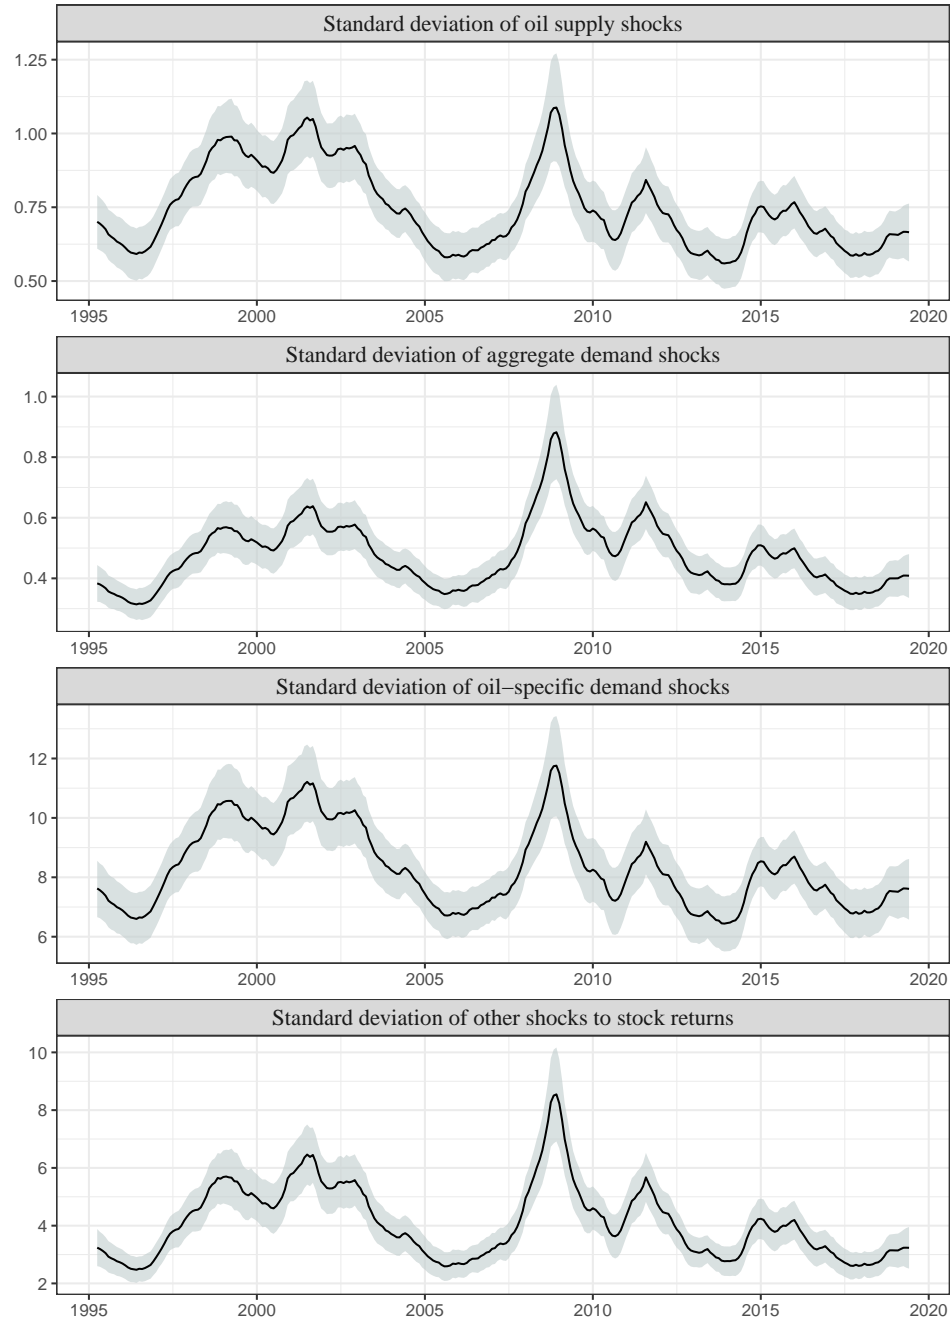

Case 13

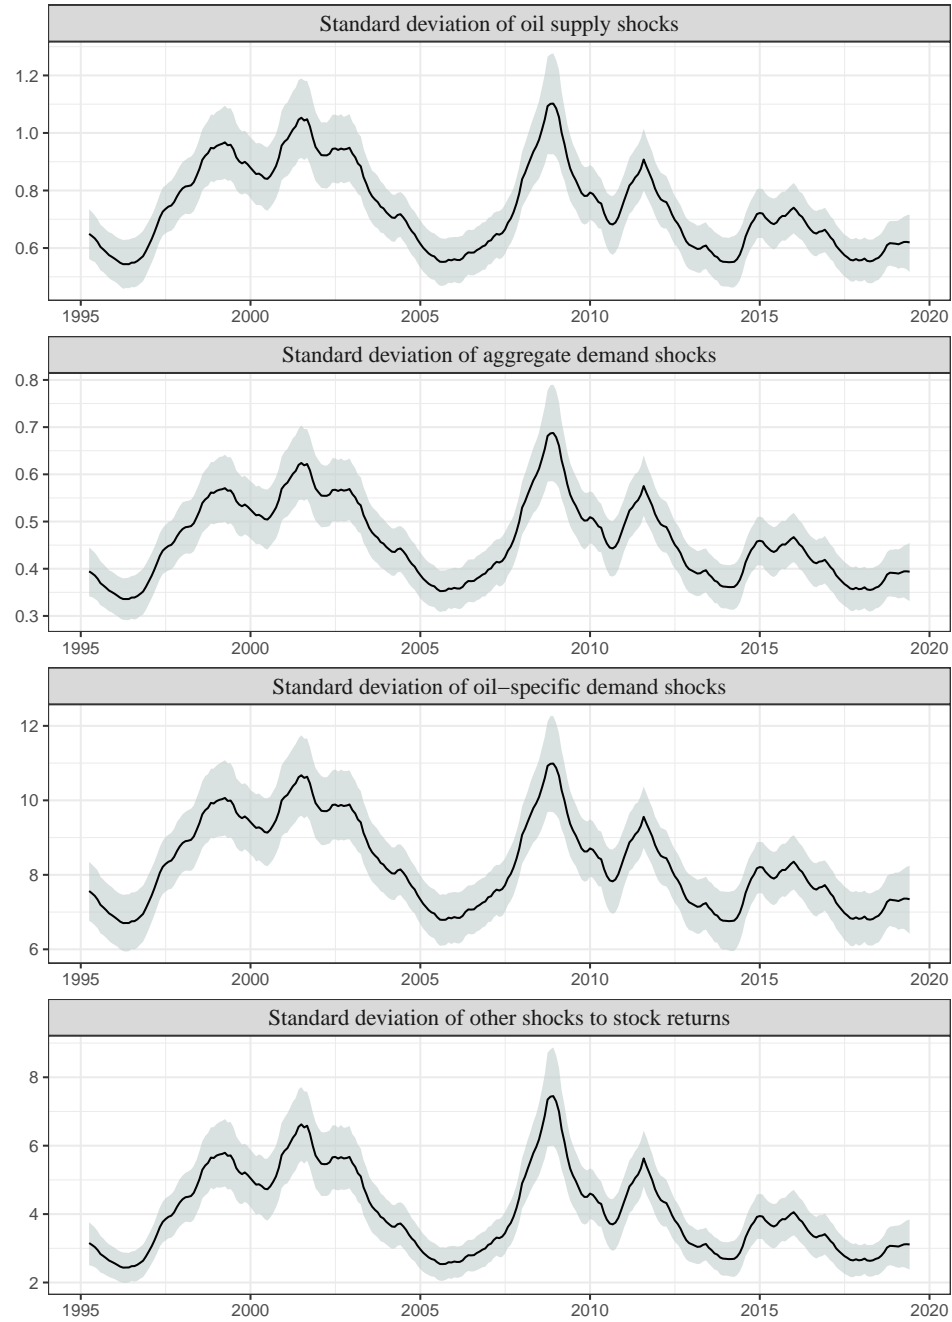

Case 14

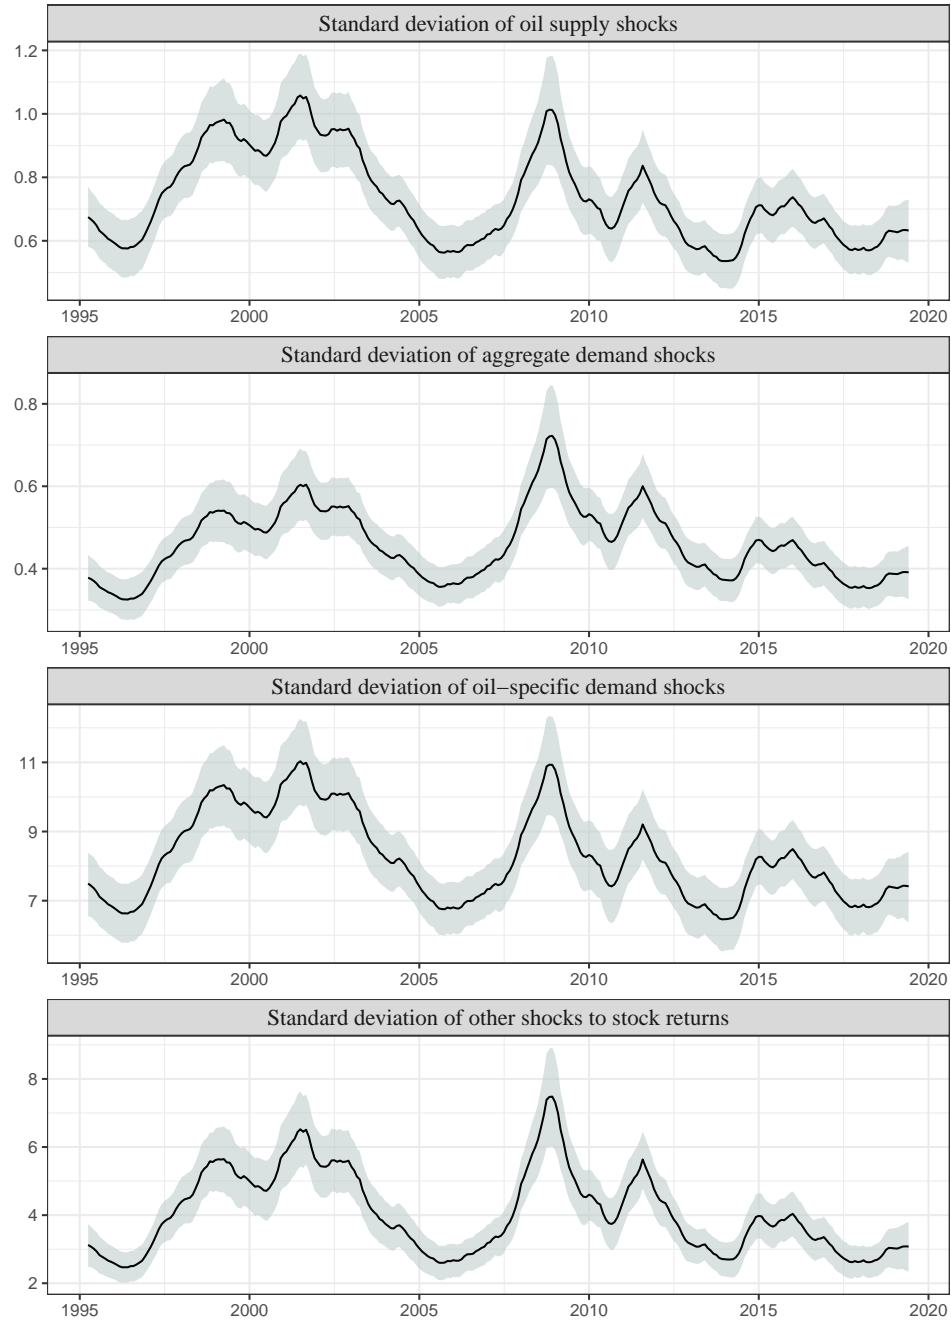



Case 15

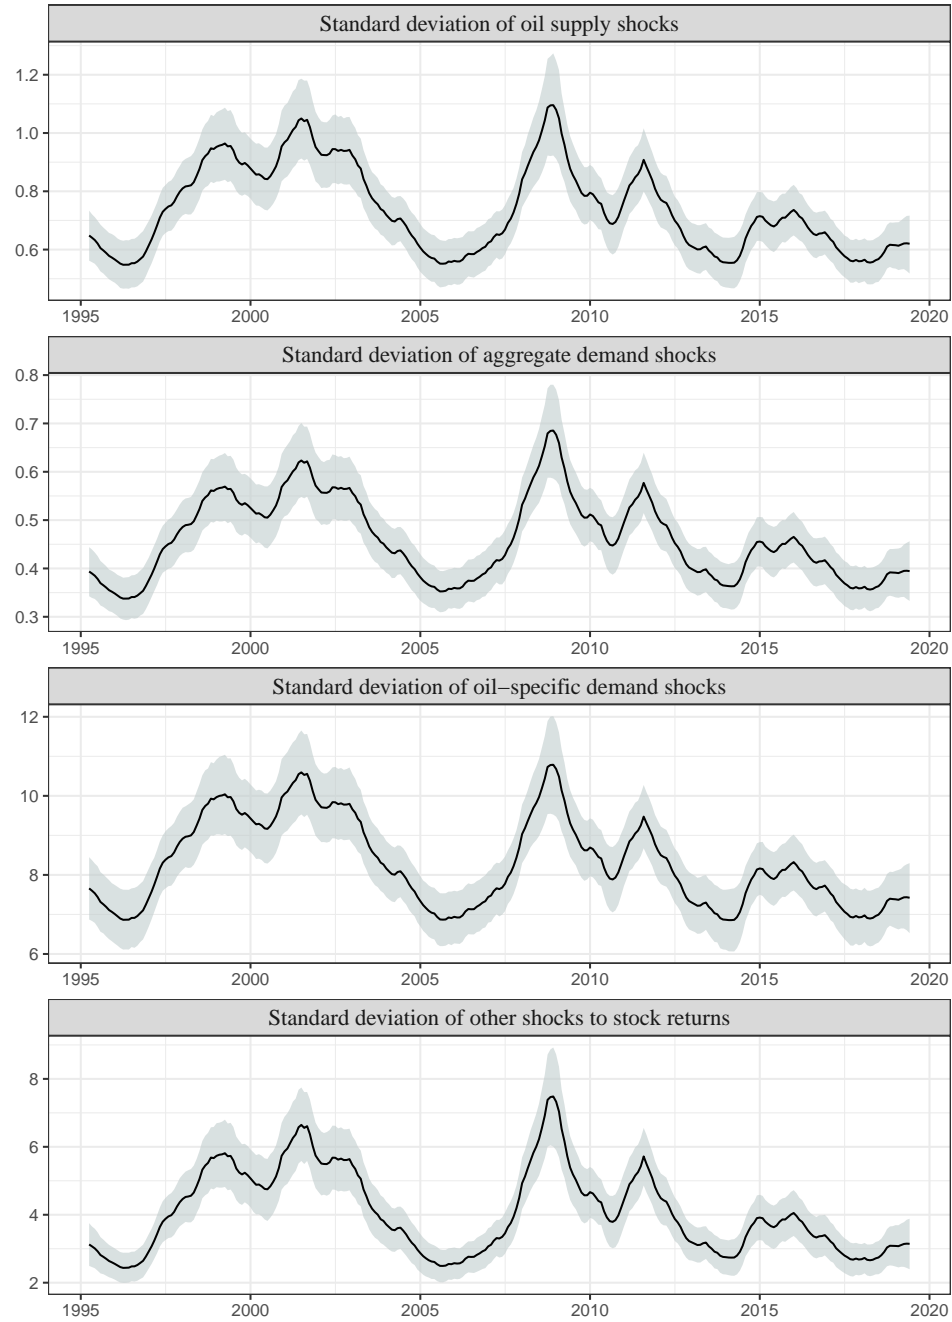

Case 16

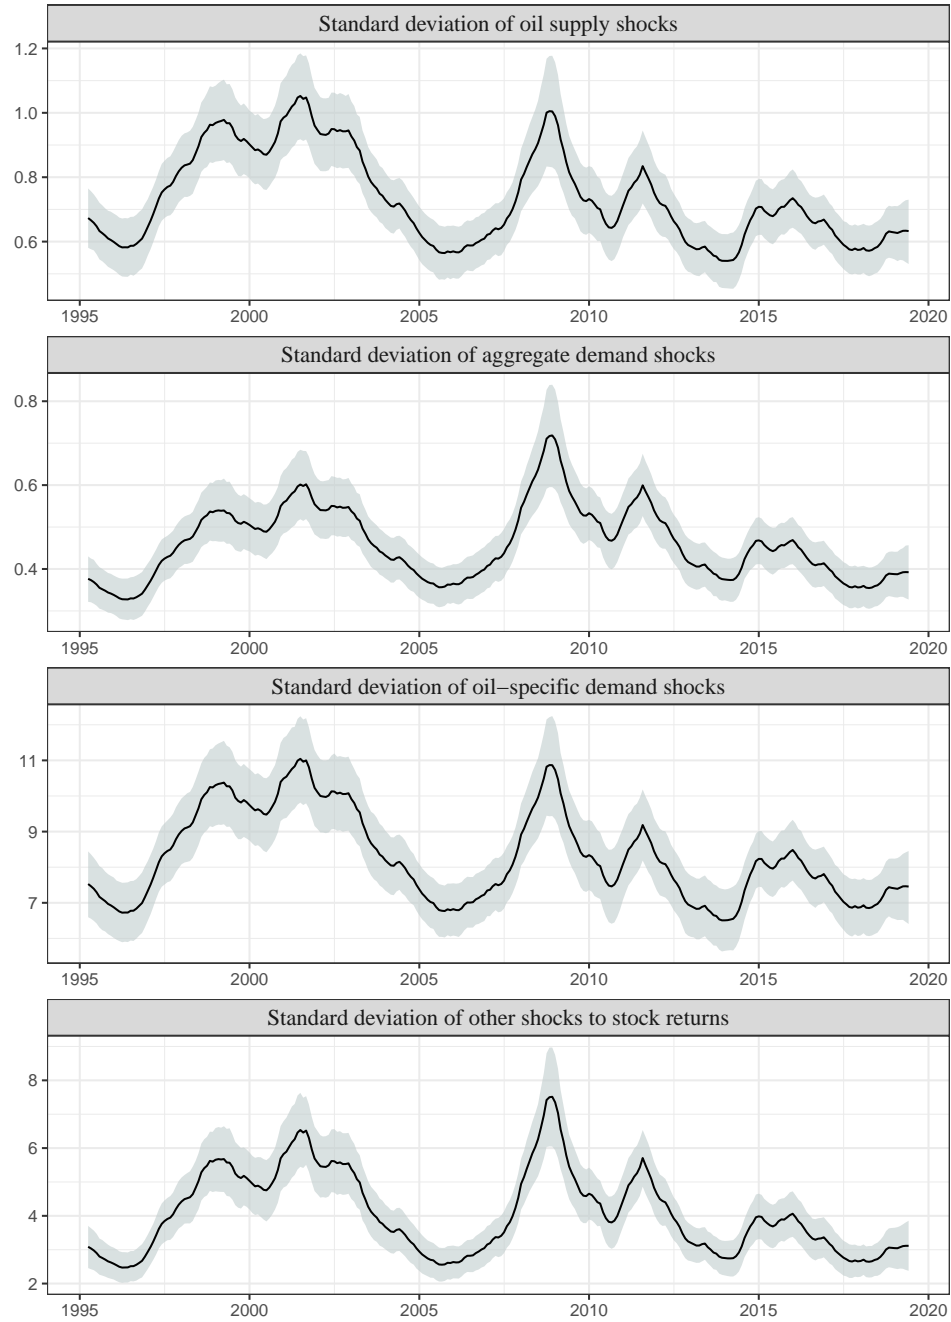

Case 17



Case 18



**Figure S2: Three-dimensional responses of stock returns to structural shocks**

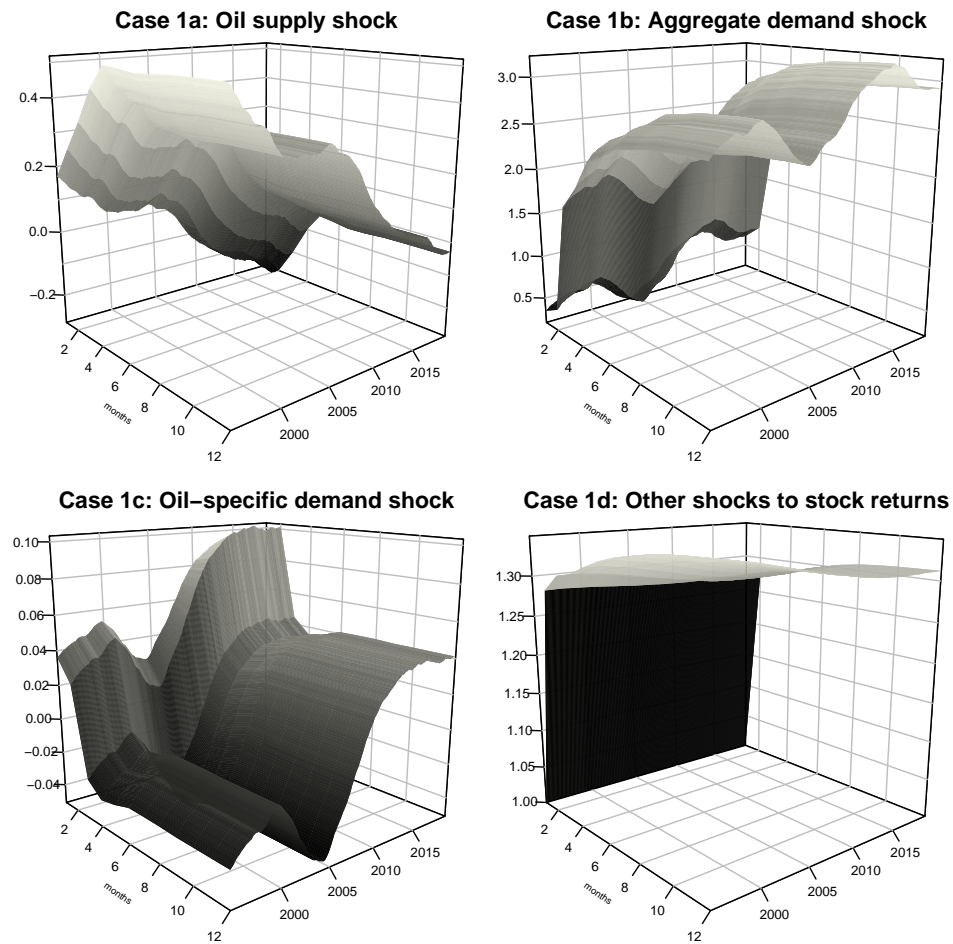

**Case 2a: Oil supply shock**

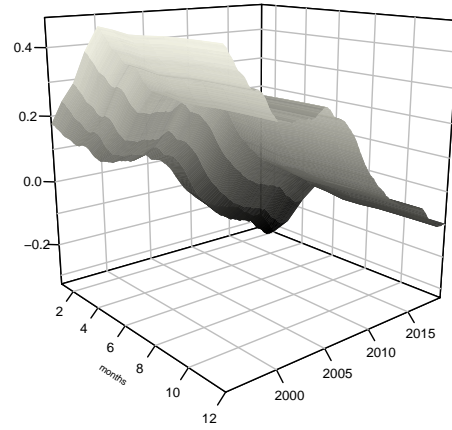

**Case 2b: Aggregate demand shock**

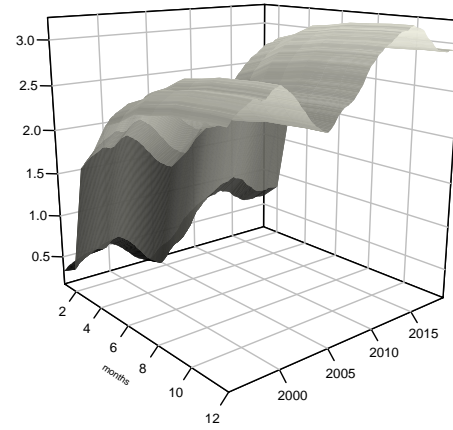

**Case 2c: Oil-specific demand shock**

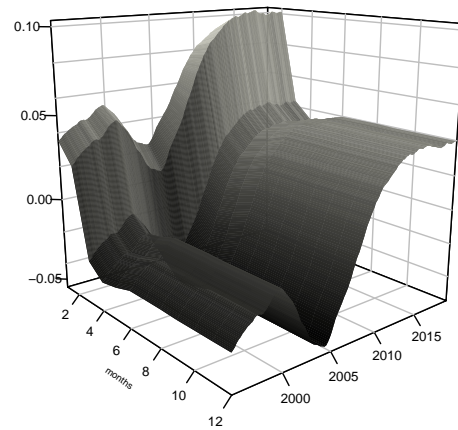

**Case 2d: Other shocks to stock returns**

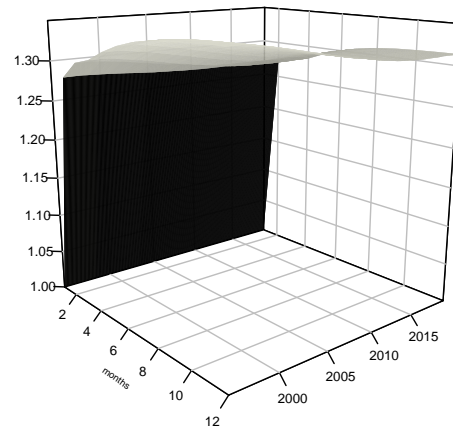

**Case 3a: Oil supply shock**

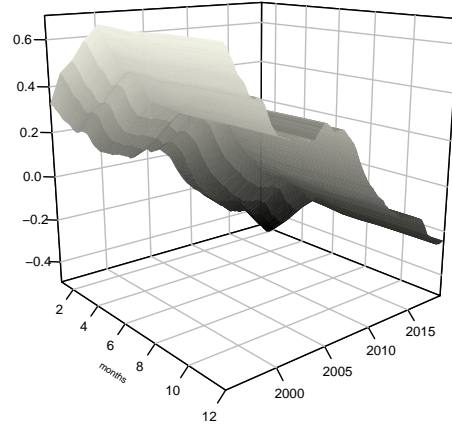

**Case 3b: Aggregate demand shock**

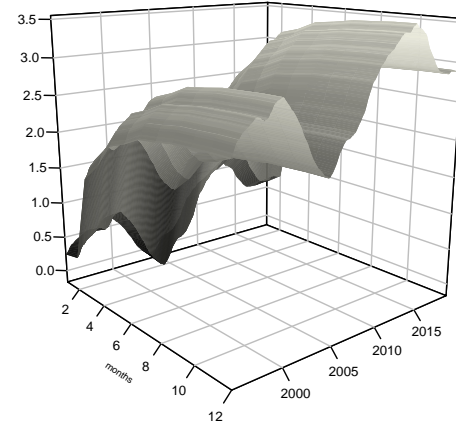

**Case 3c: Oil-specific demand shock**

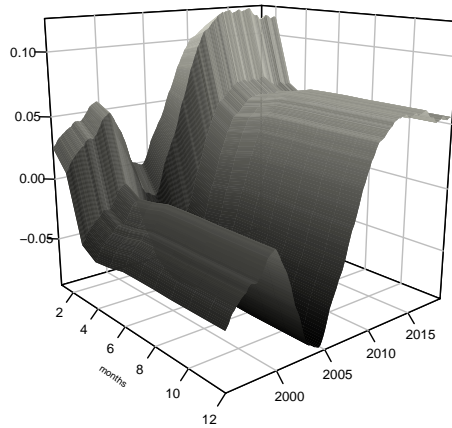

**Case 3d: Other shocks to stock returns**

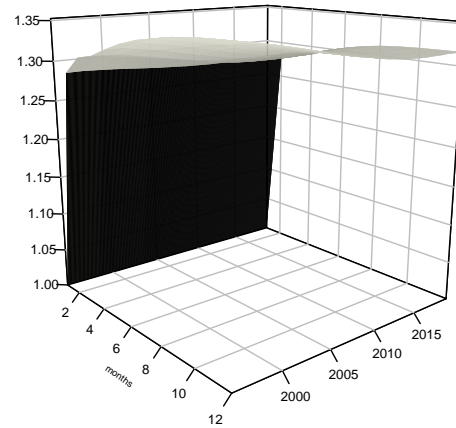

**Case 4a: Oil supply shock**

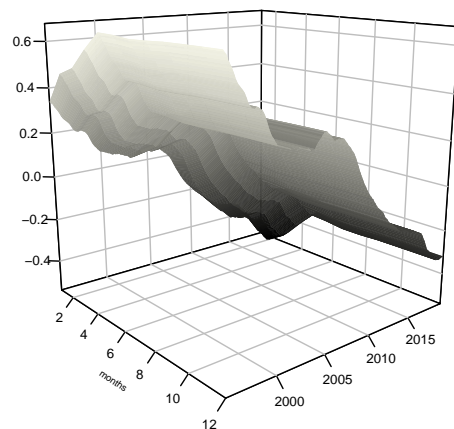

**Case 4b: Aggregate demand shock**

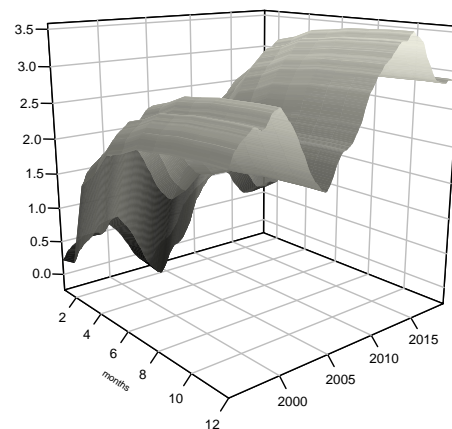

**Case 4c: Oil-specific demand shock**

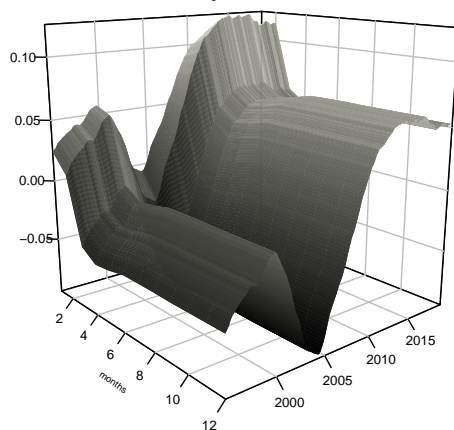

**Case 4d: Other shocks to stock returns**

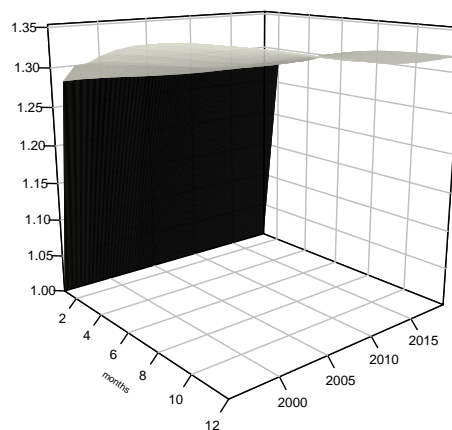



**Case 5a: Oil supply shock**

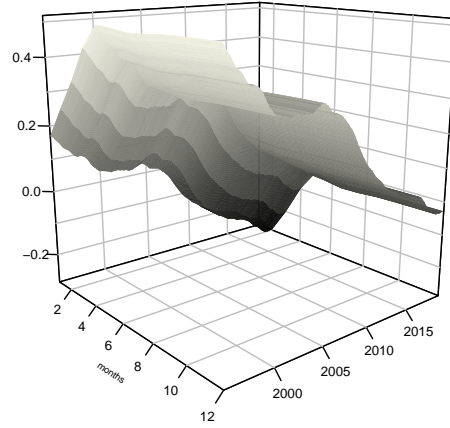

**Case 5b: Aggregate demand shock**

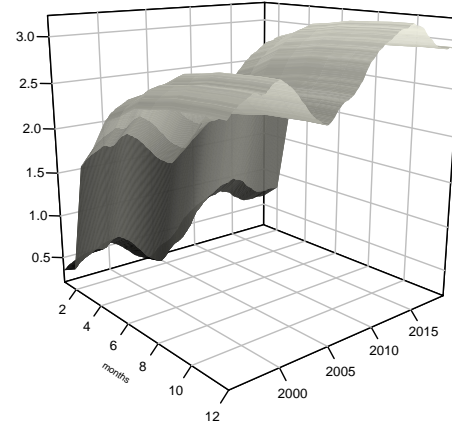

**Case 5c: Oil-specific demand shock**

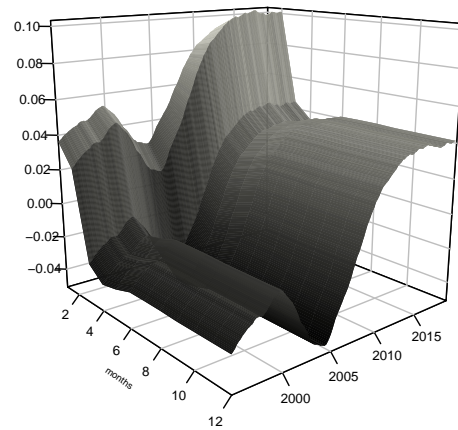

**Case 5d: Other shocks to stock returns**

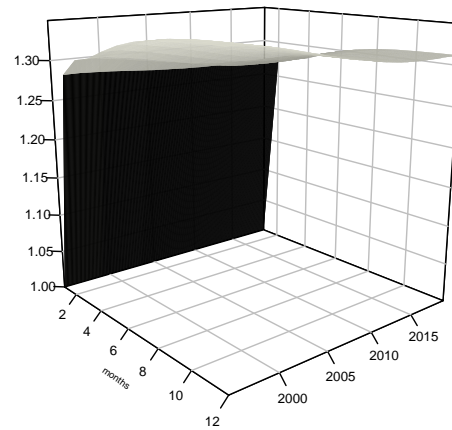

**Case 6a: Oil supply shock**

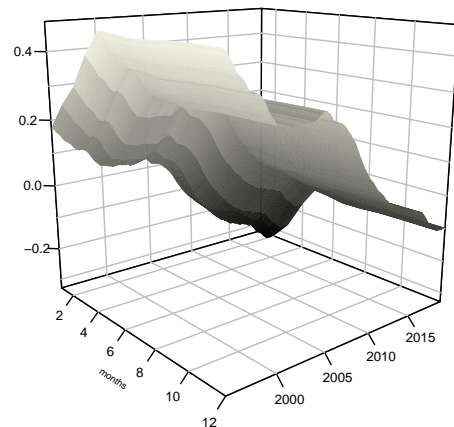

**Case 6b: Aggregate demand shock**

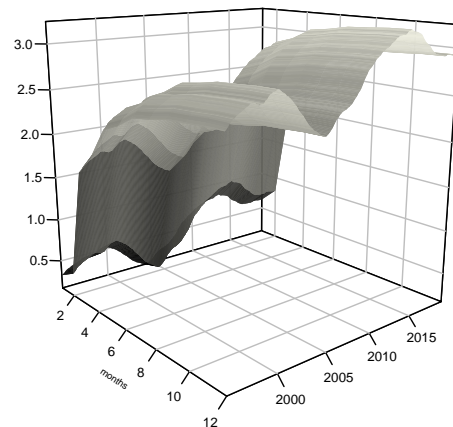

**Case 6c: Oil-specific demand shock**

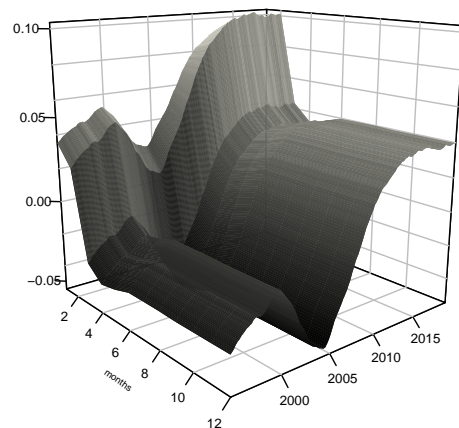

**Case 6d: Other shocks to stock returns**

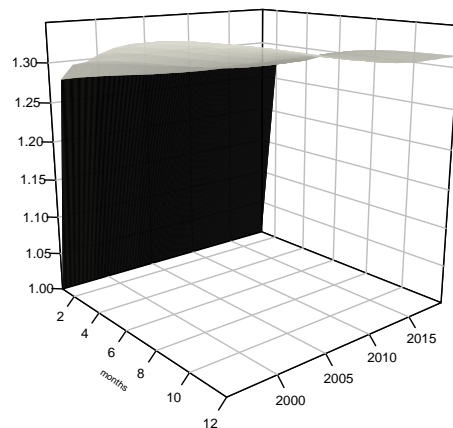

**Case 7a: Oil supply shock**

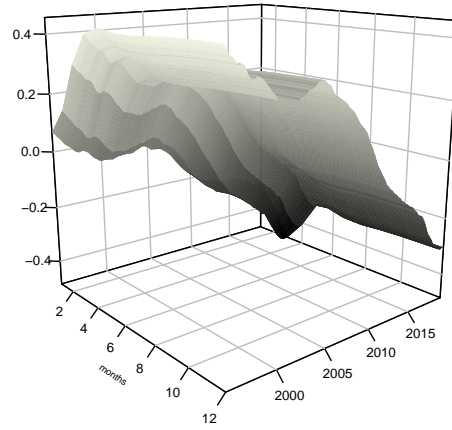

**Case 7b: Aggregate demand shock**

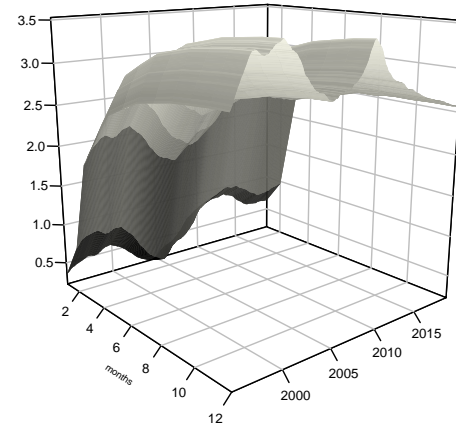

**Case 7c: Oil-specific demand shock**

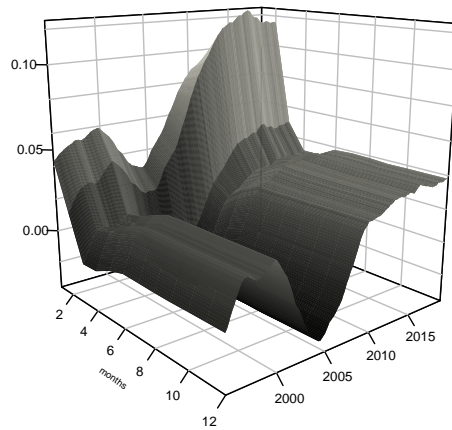

**Case 7d: Other shocks to stock returns**

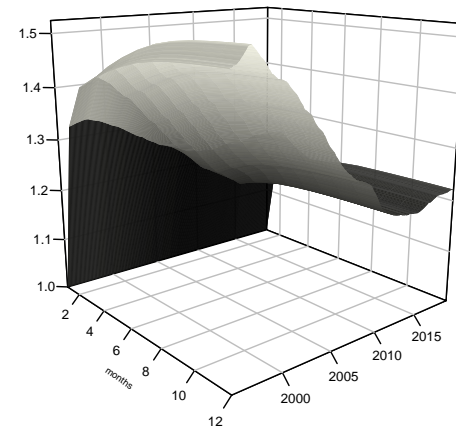

**Case 8a: Oil supply shock**

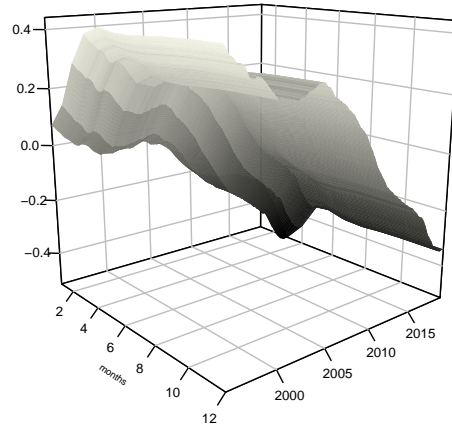

**Case 8b: Aggregate demand shock**

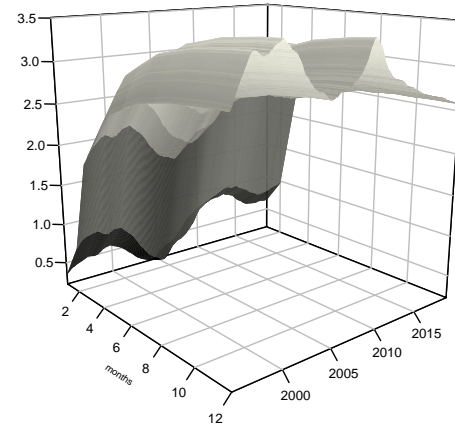

**Case 8c: Oil-specific demand shock**

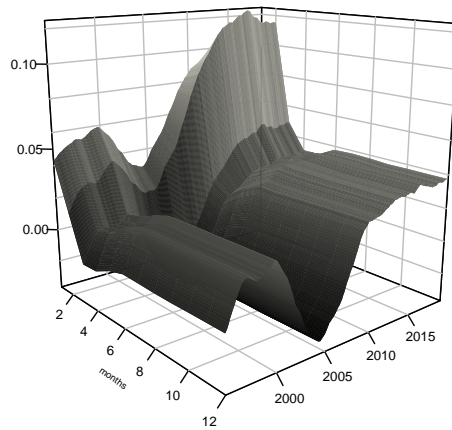

**Case 8d: Other shocks to stock returns**

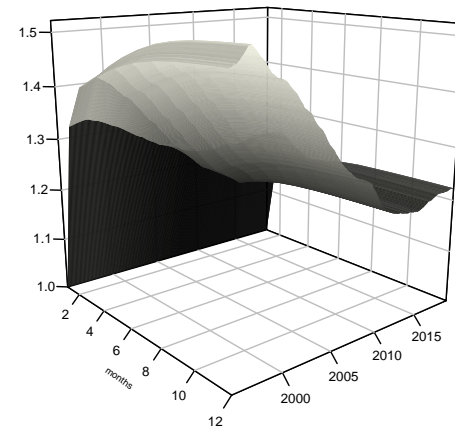

**Case 9a: Oil supply shock**

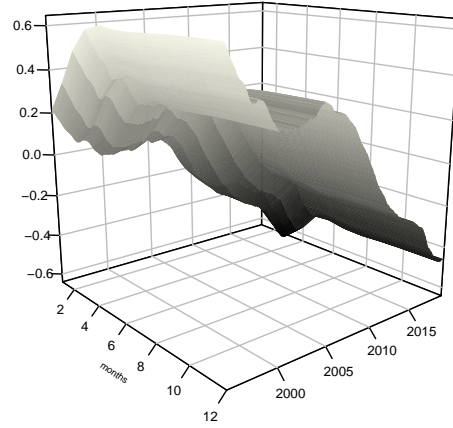

**Case 9b: Aggregate demand shock**

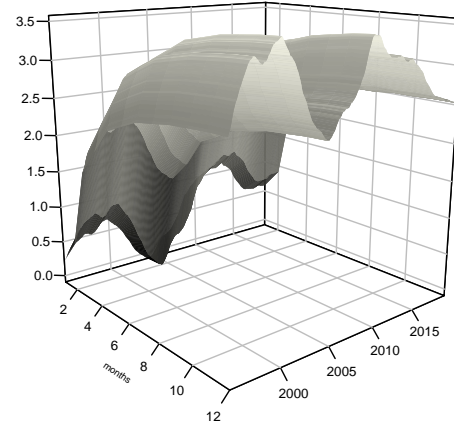

**Case 9c: Oil-specific demand shock**

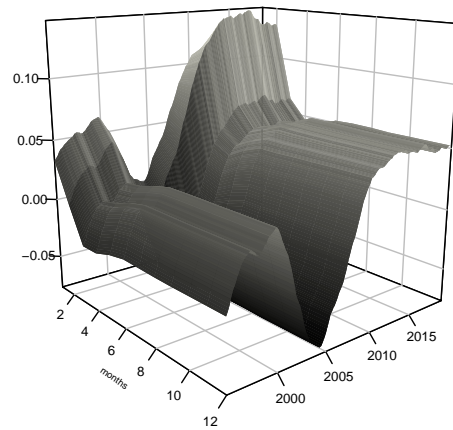

**Case 9d: Other shocks to stock returns**

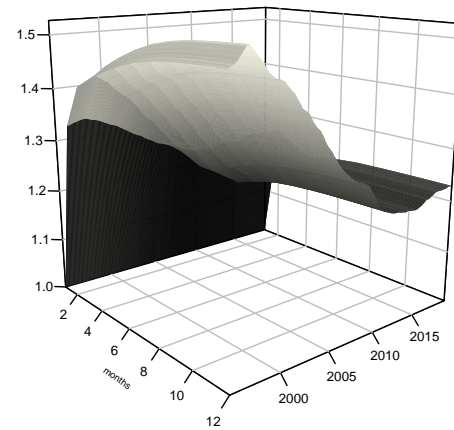

**Case 10a: Oil supply shock**

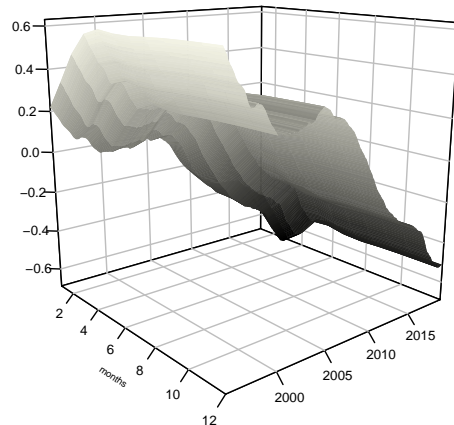

**Case 10b: Aggregate demand shock**

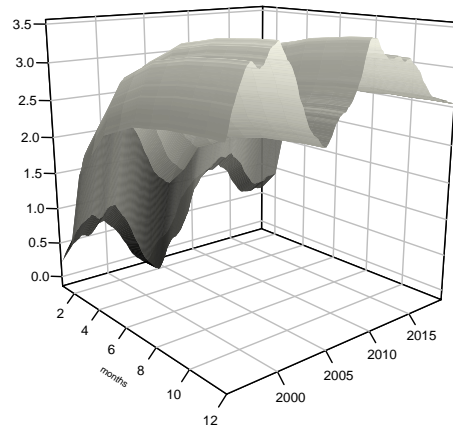

**Case 10c: Oil-specific demand shock**

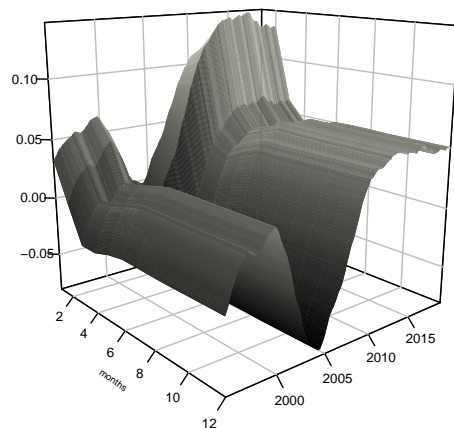

**Case 10d: Other shocks to stock returns**

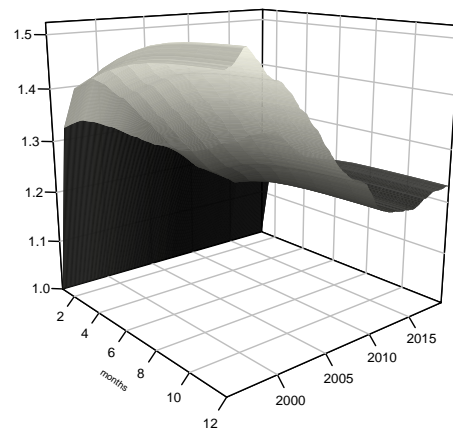

**Case 11a: Oil supply shock**



**Case 11b: Aggregate demand shock**

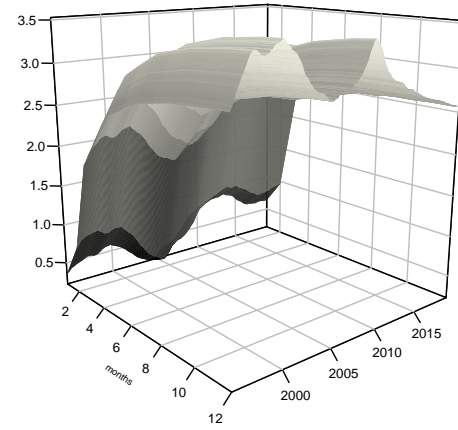

**Case 11c: Oil-specific demand shock**



**Case 11d: Other shocks to stock returns**

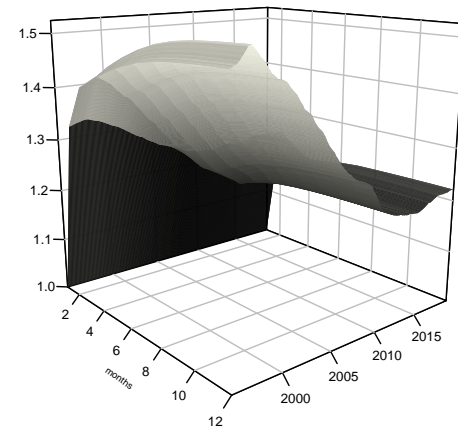

**Case 12a: Oil supply shock**

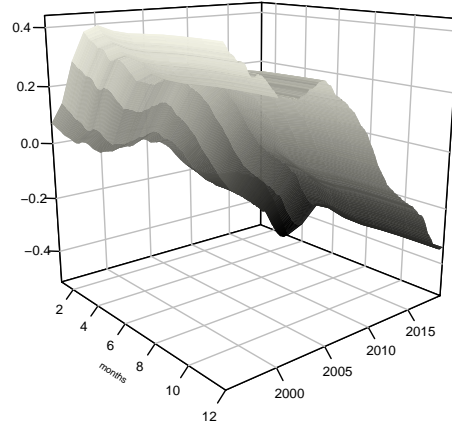

**Case 12b: Aggregate demand shock**

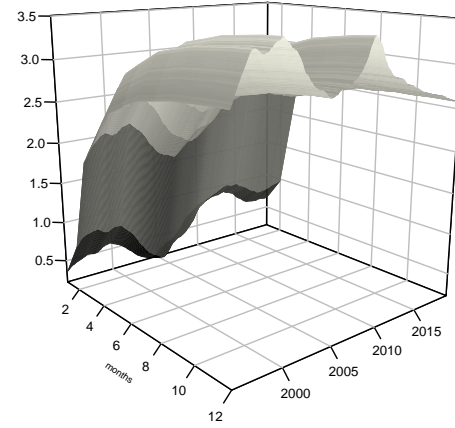

**Case 12c: Oil-specific demand shock**

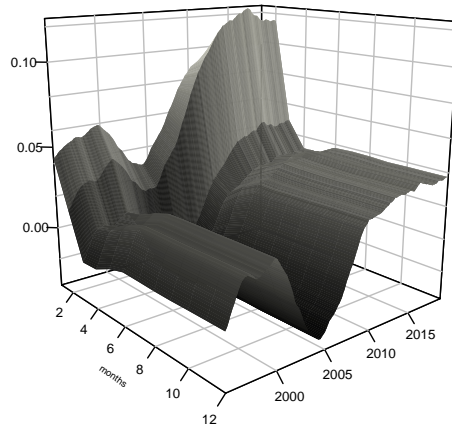

**Case 12d: Other shocks to stock returns**

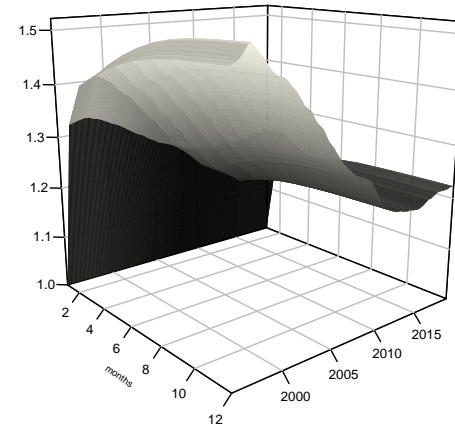



**Case 13a: Oil supply shock**

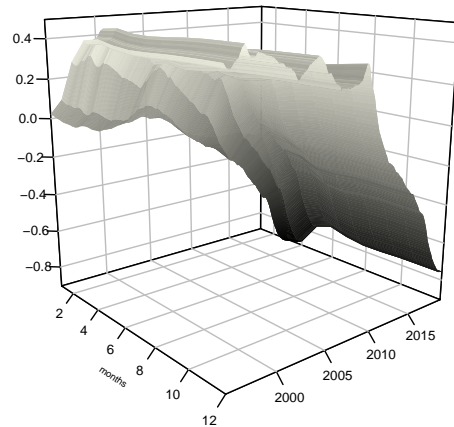

**Case 13b: Aggregate demand shock**

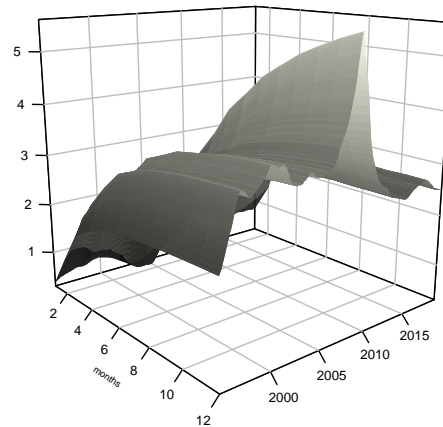

**Case 13c: Oil-specific demand shock**

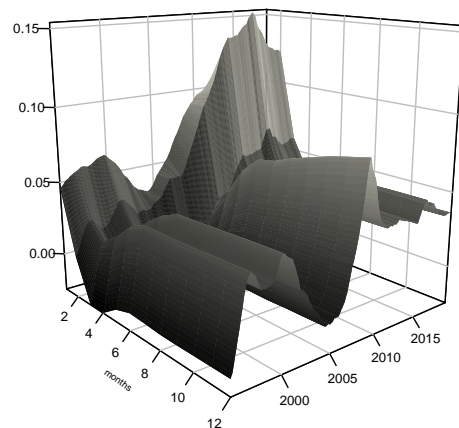

**Case 13d: Other shocks to stock returns**

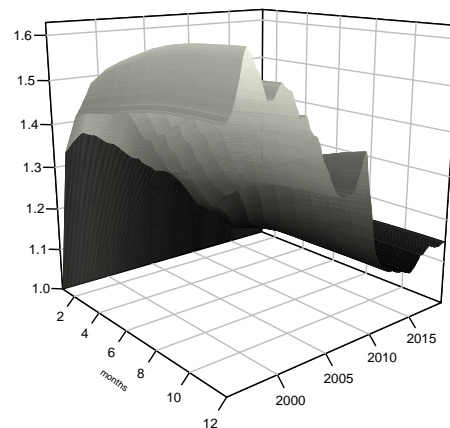

**Case 14a: Oil supply shock**

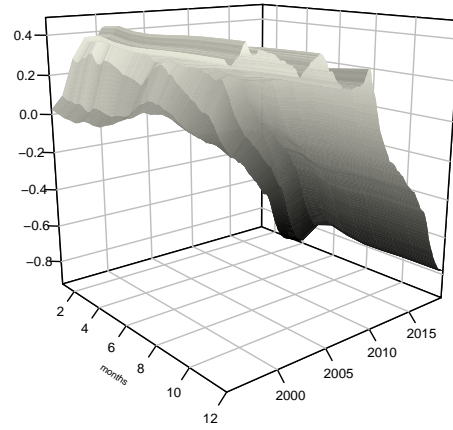

**Case 14b: Aggregate demand shock**

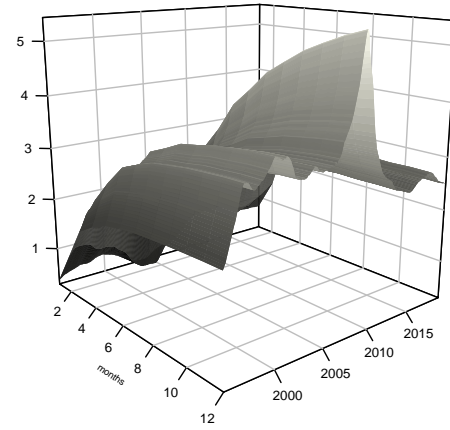

**Case 14c: Oil-specific demand shock**

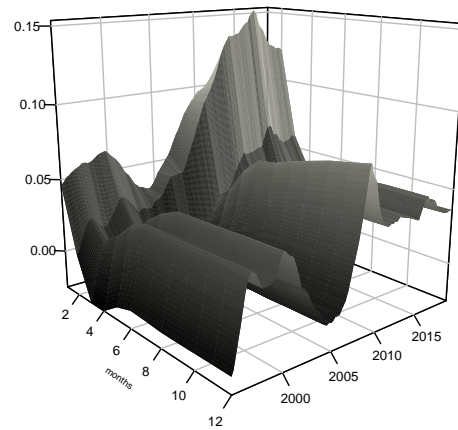

**Case 14d: Other shocks to stock returns**

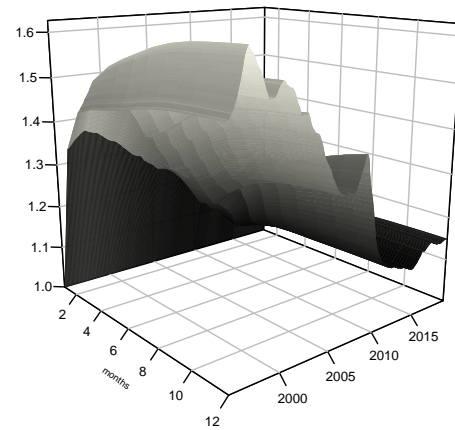

**Case 15a: Oil supply shock**

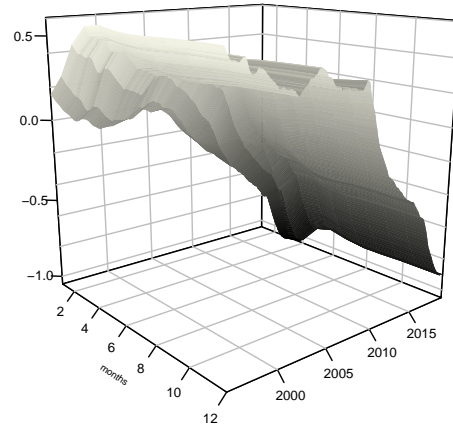

**Case 15b: Aggregate demand shock**

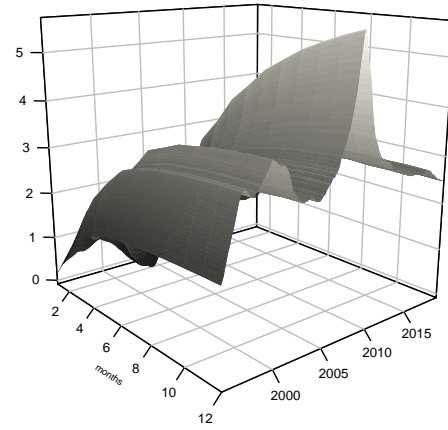

**Case 15c: Oil-specific demand shock**

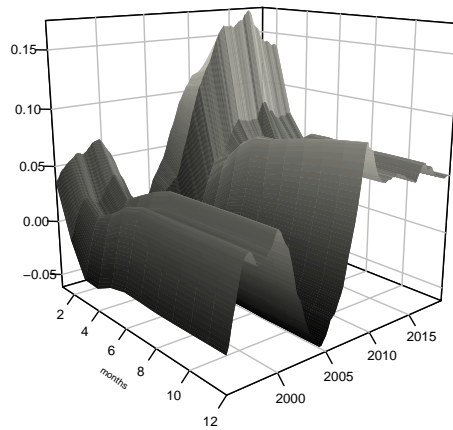

**Case 15d: Other shocks to stock returns**

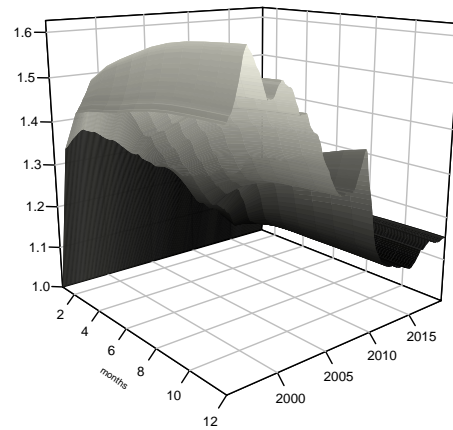

**Case 16a: Oil supply shock**

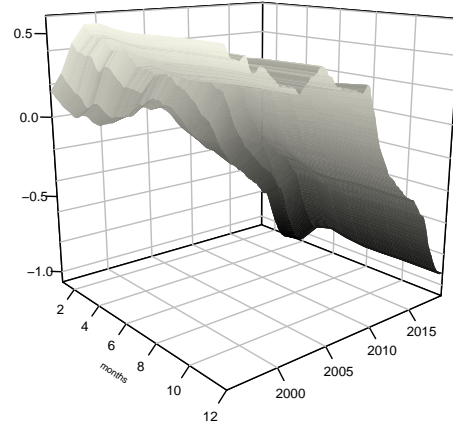

**Case 16b: Aggregate demand shock**

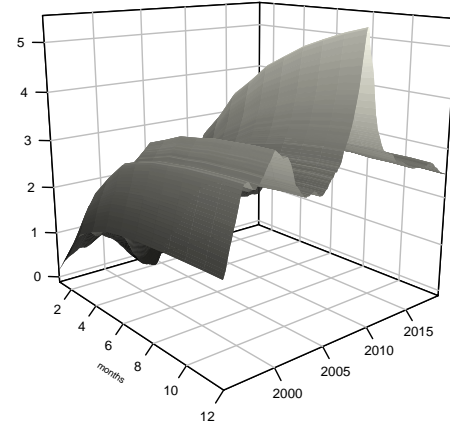

**Case 16c: Oil-specific demand shock**

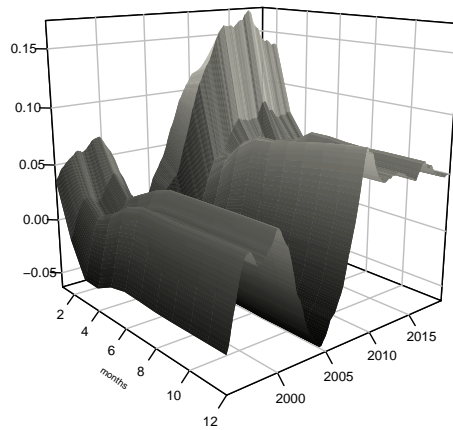

**Case 16d: Other shocks to stock returns**

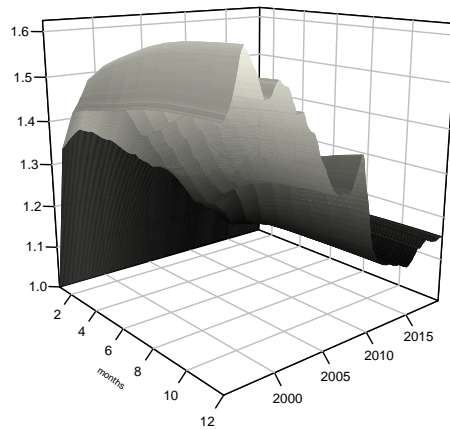

**Case 17a: Oil supply shock**

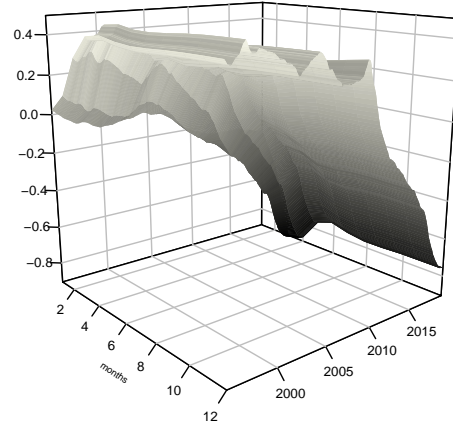

**Case 17b: Aggregate demand shock**

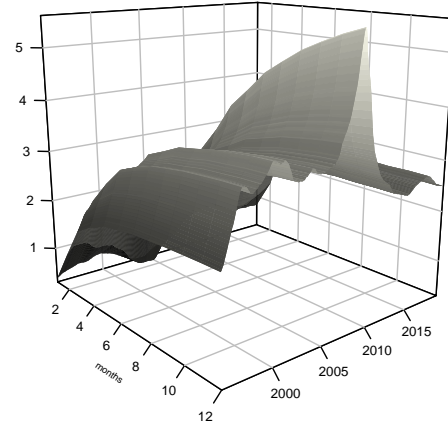

**Case 17c: Oil-specific demand shock**

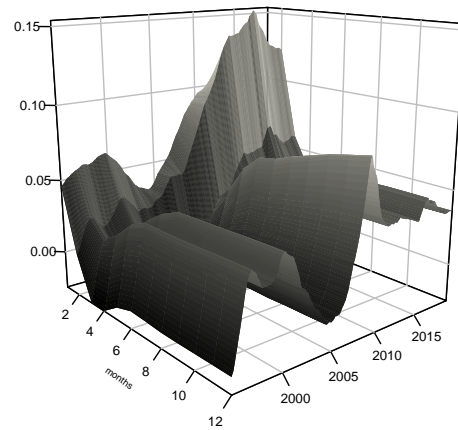

**Case 17d: Other shocks to stock returns**

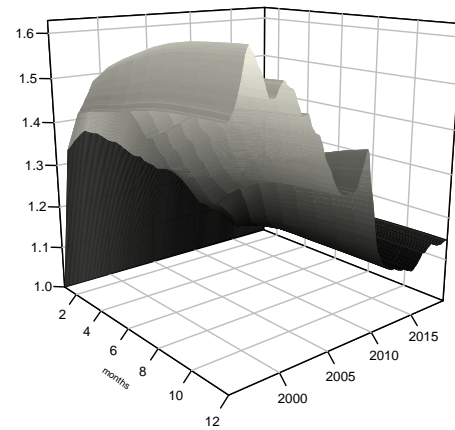

**Case 18a: Oil supply shock**

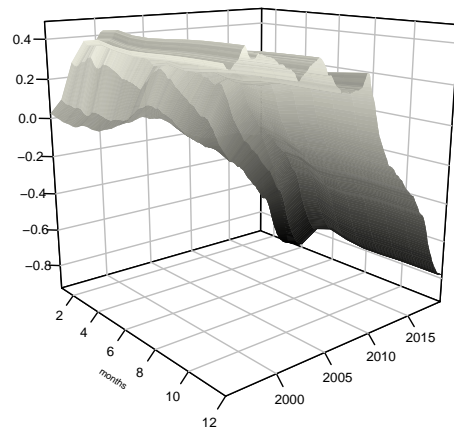

**Case 18b: Aggregate demand shock**

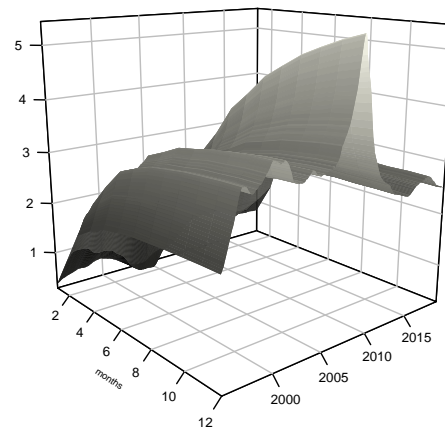

**Case 18c: Oil-specific demand shock**

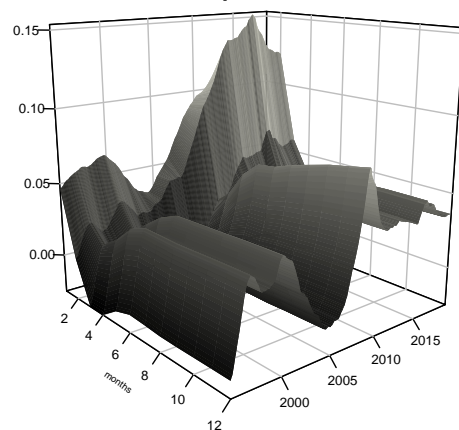

**Case 18d: Other shocks to stock returns**

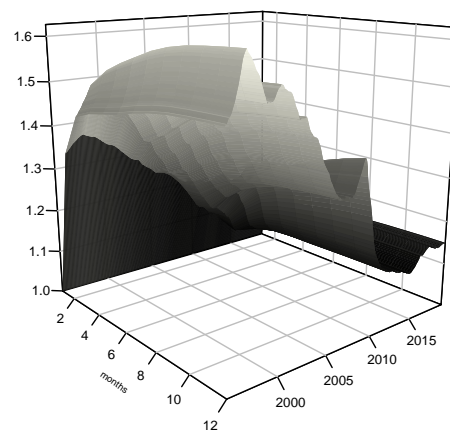

**Figure S3: Responses of stock returns to structural shocks at different horizons**

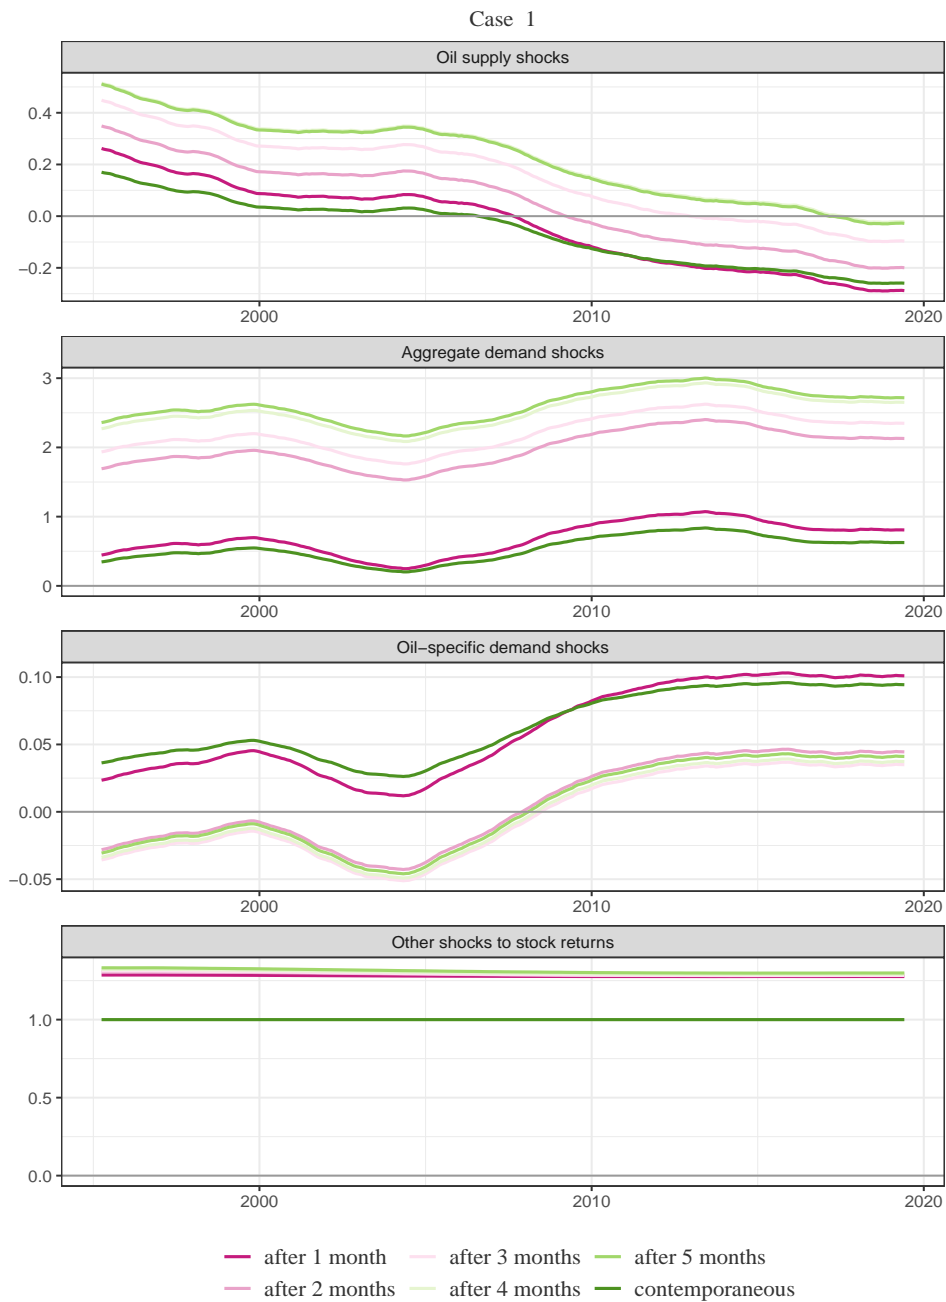

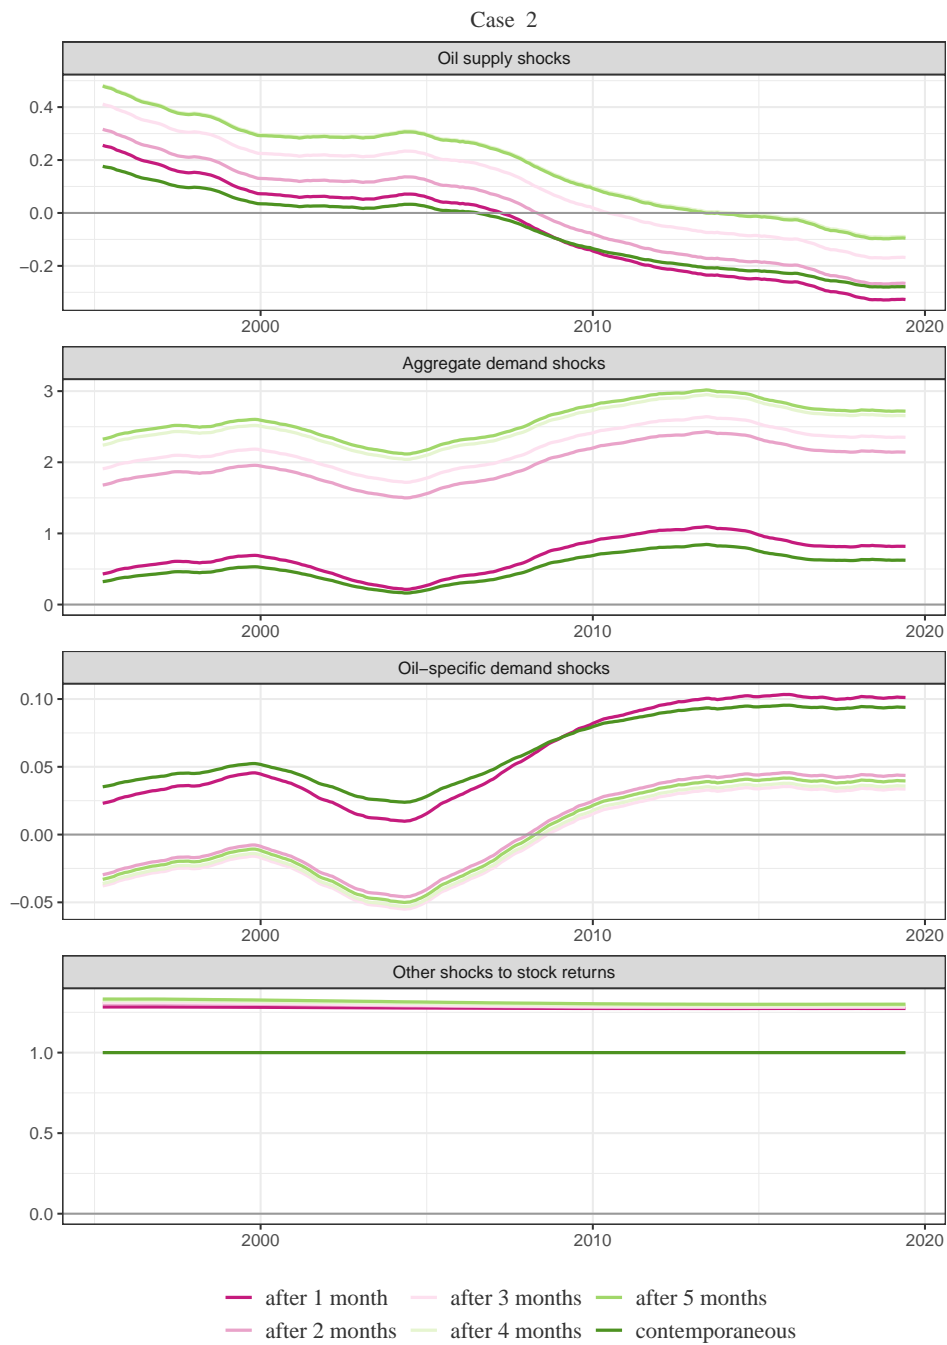



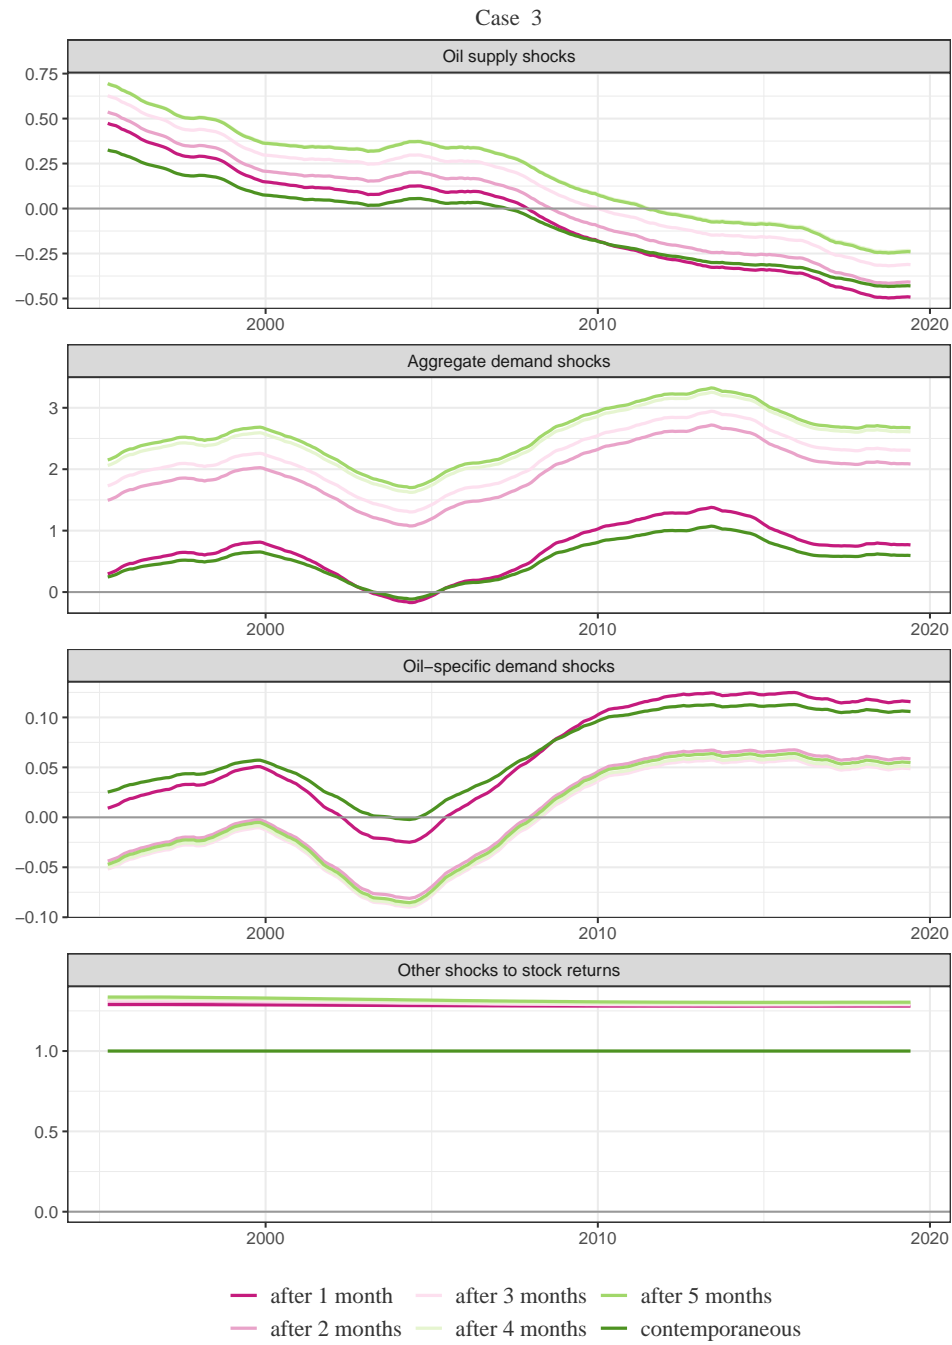

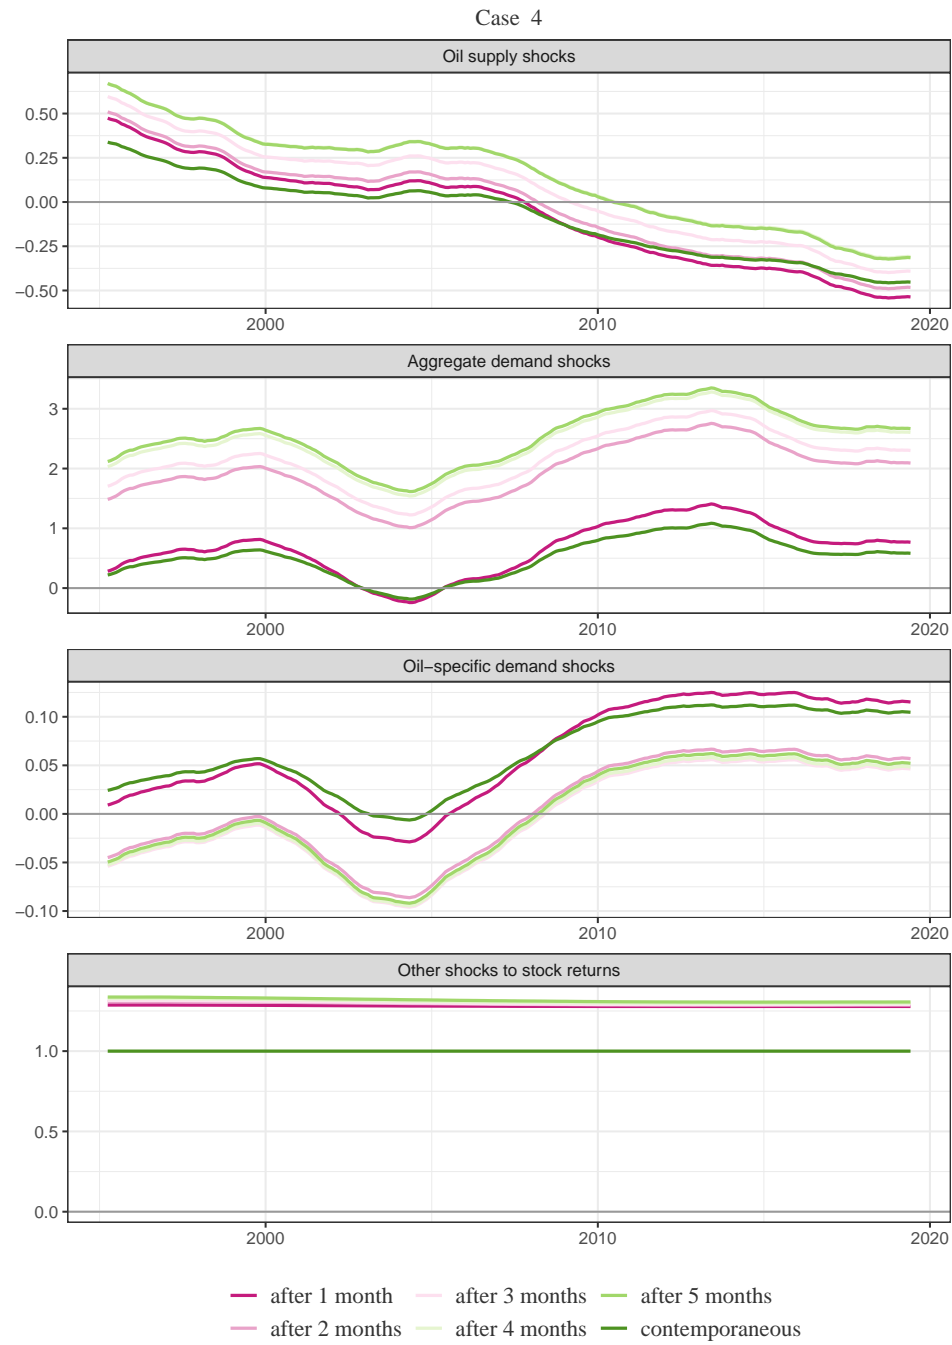

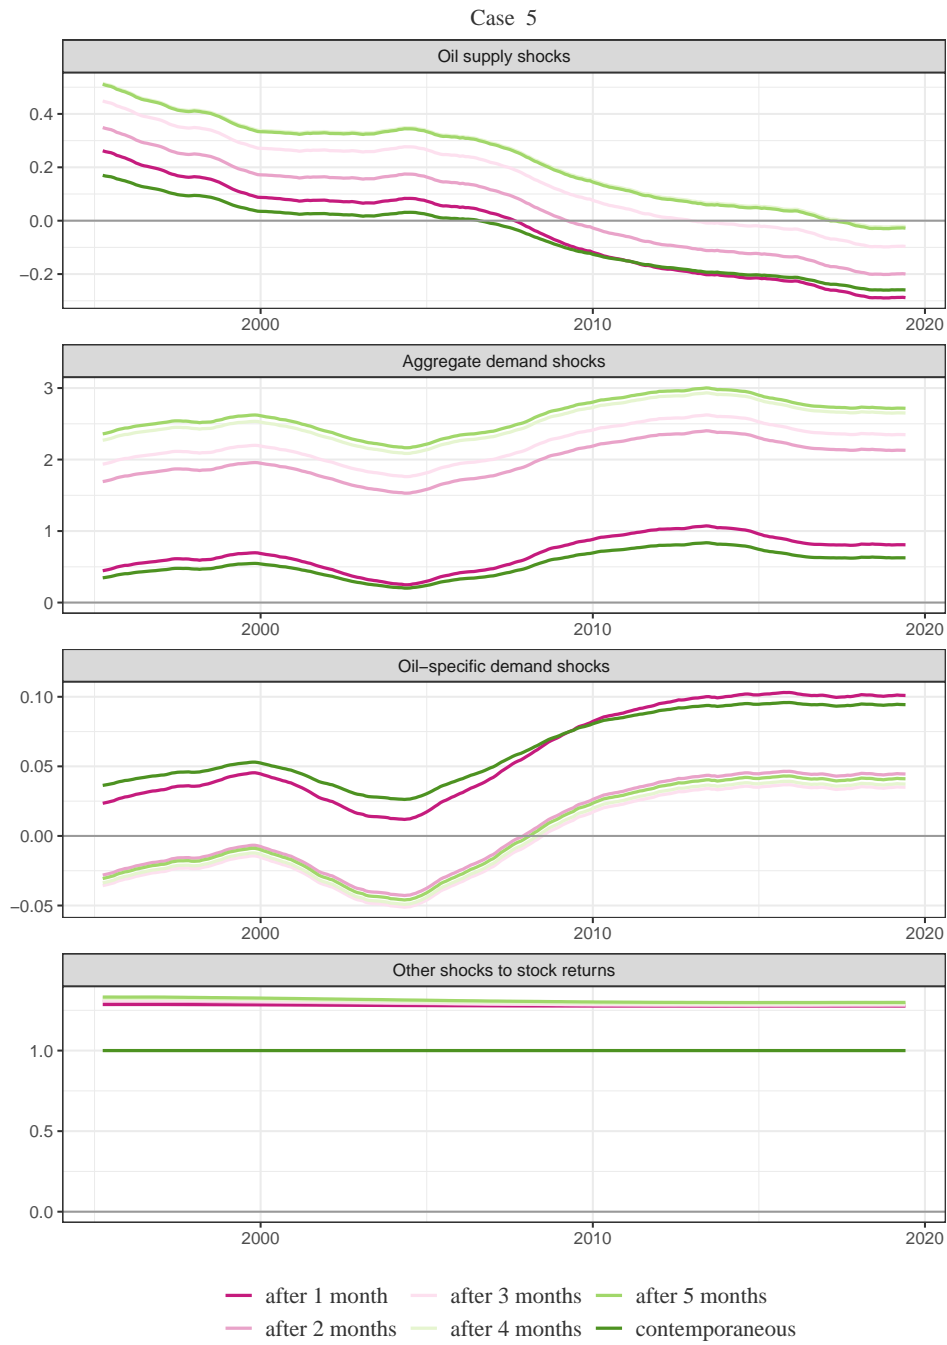

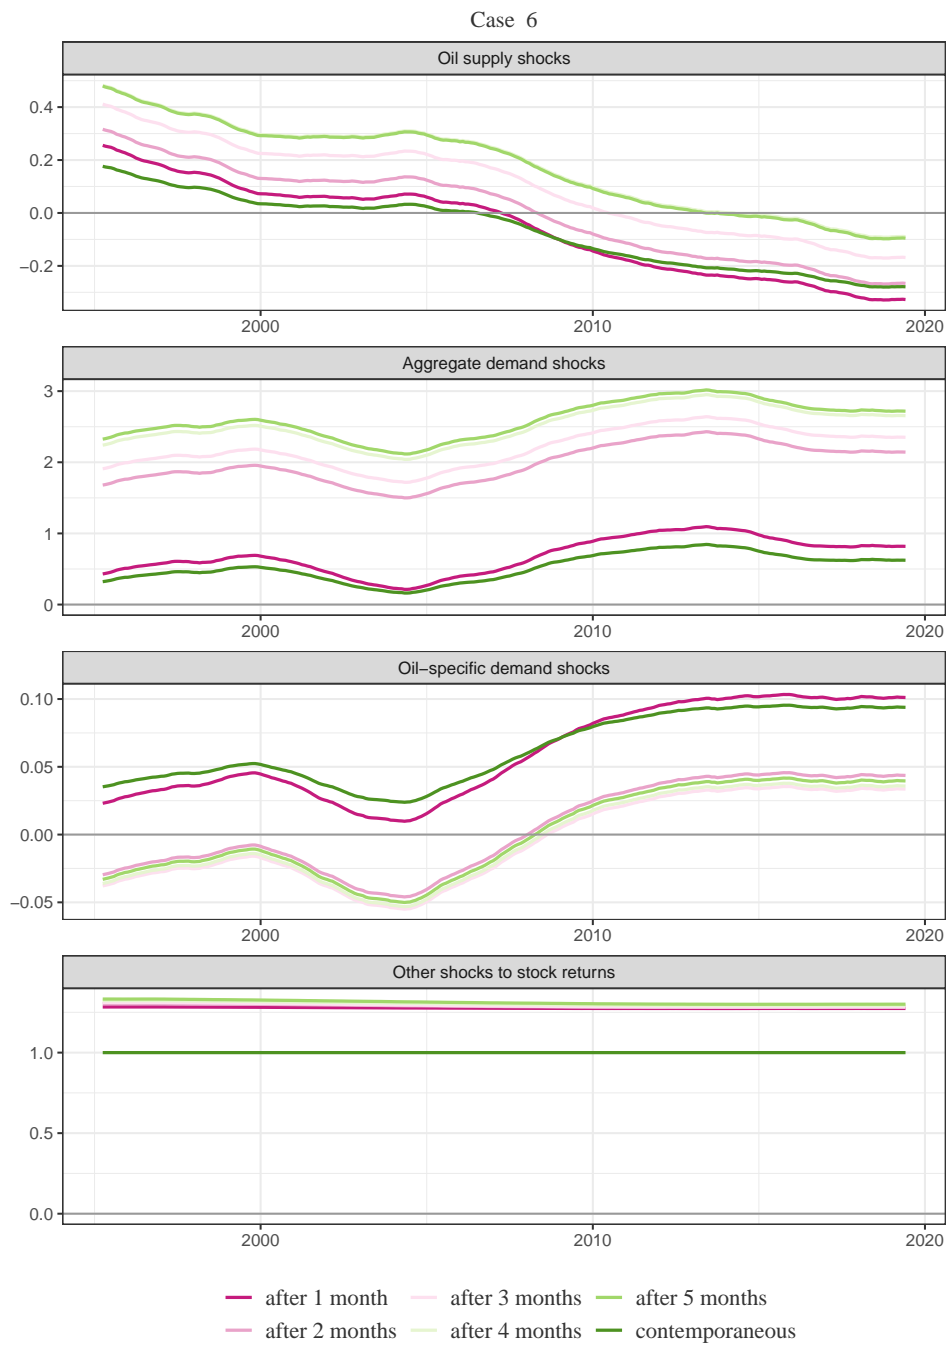

Case 7

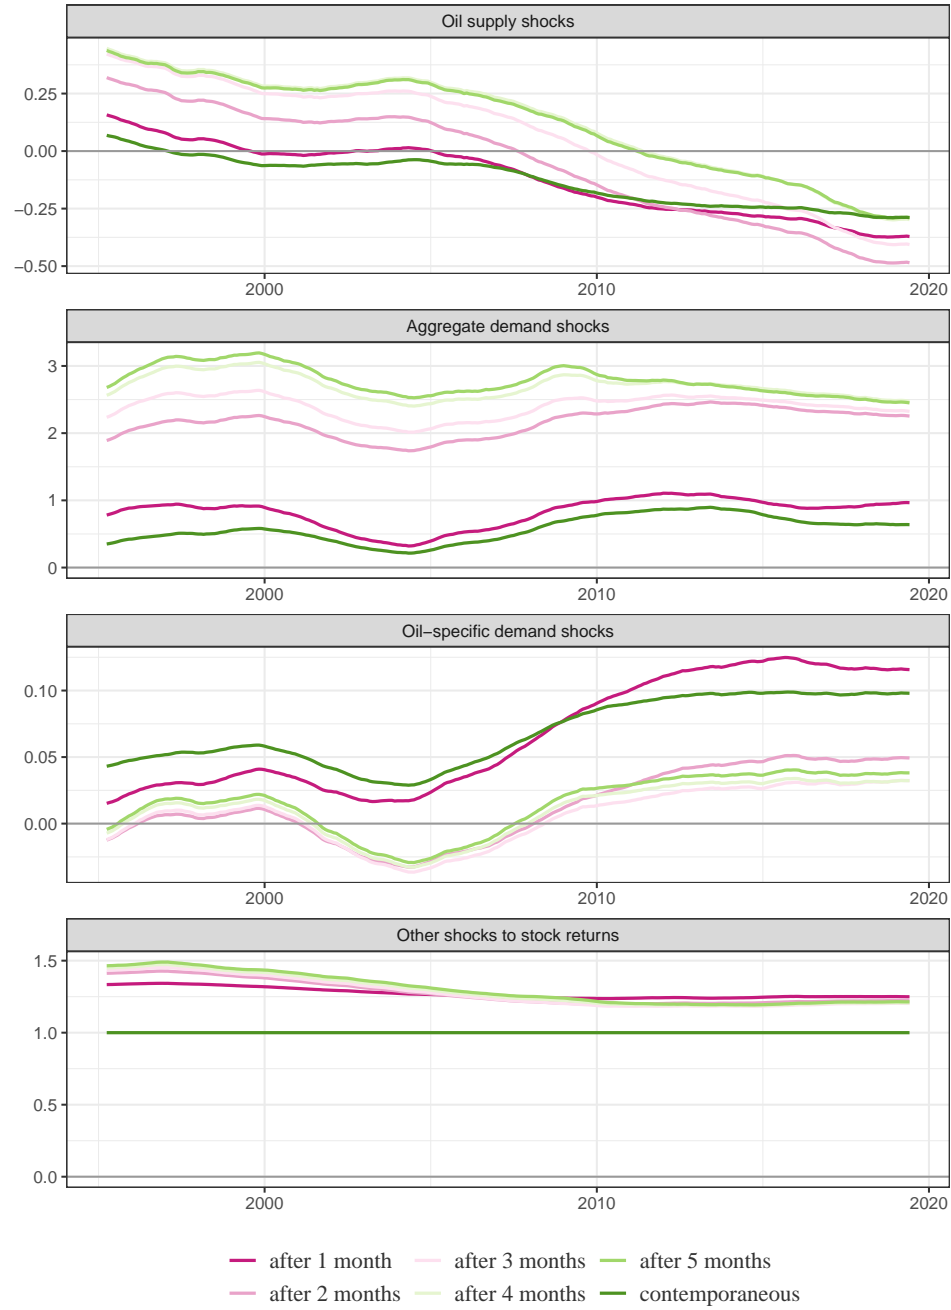

Case 8

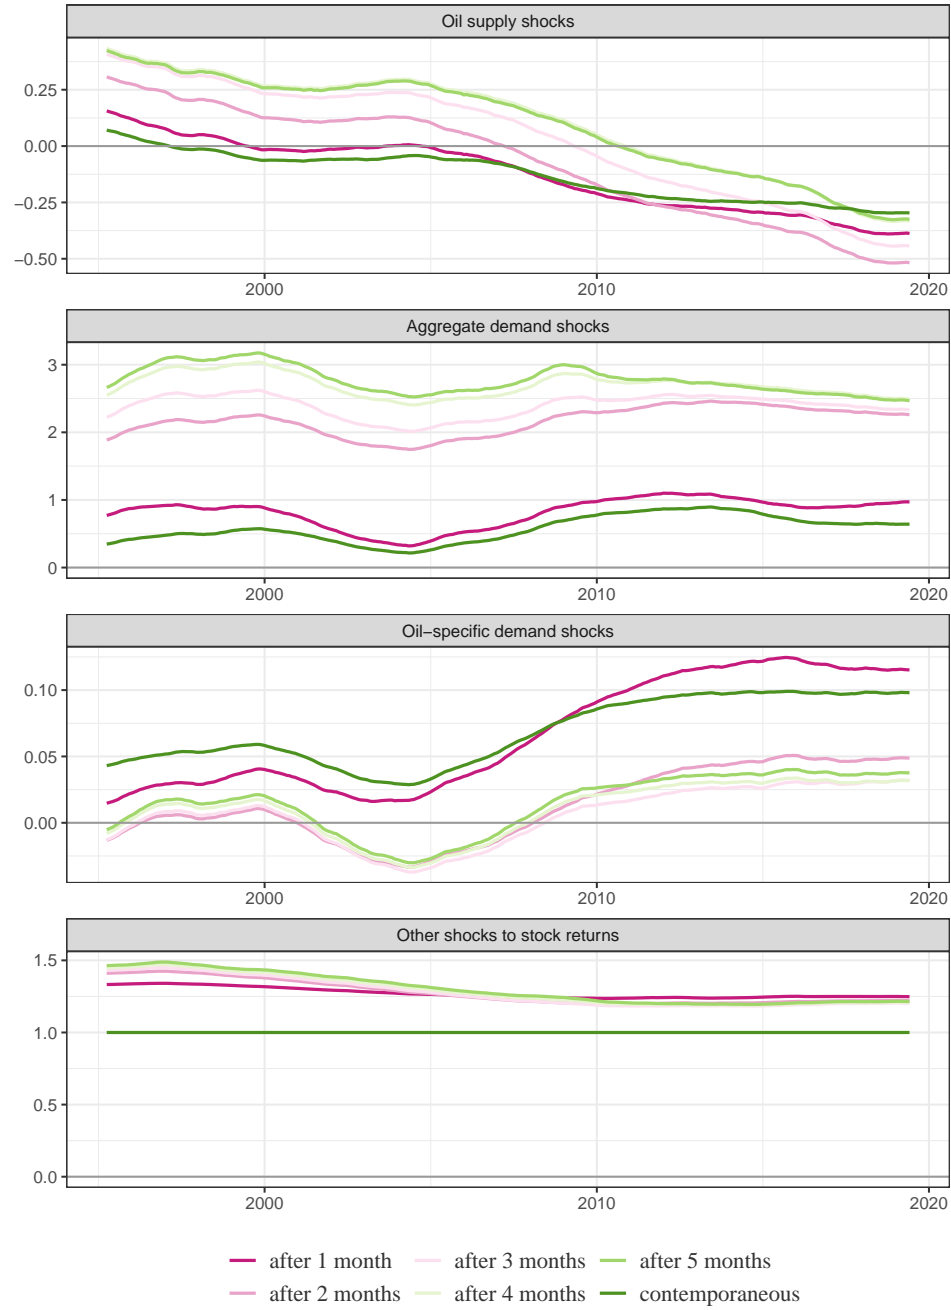

Case 9

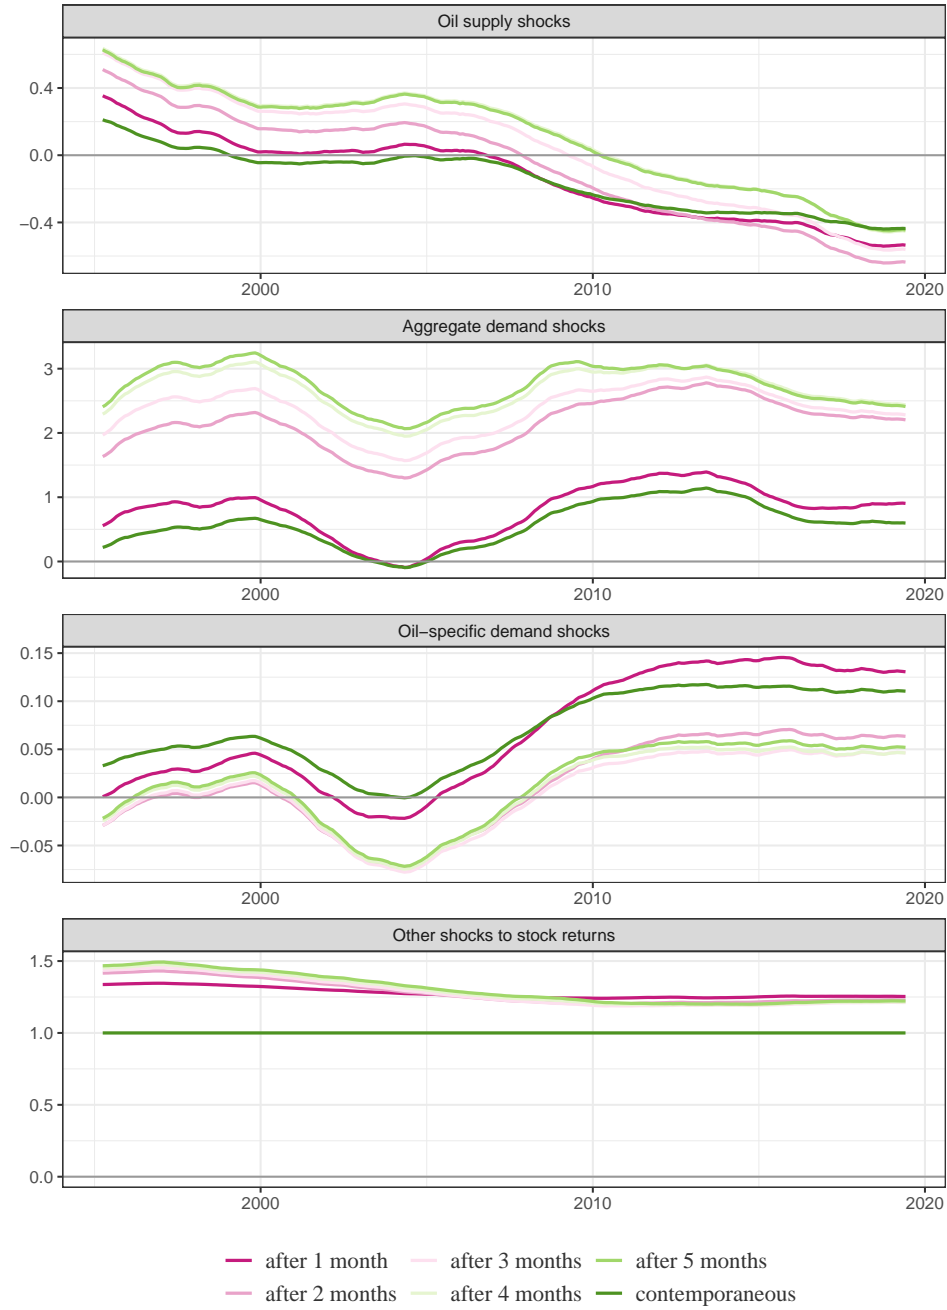

Case 10

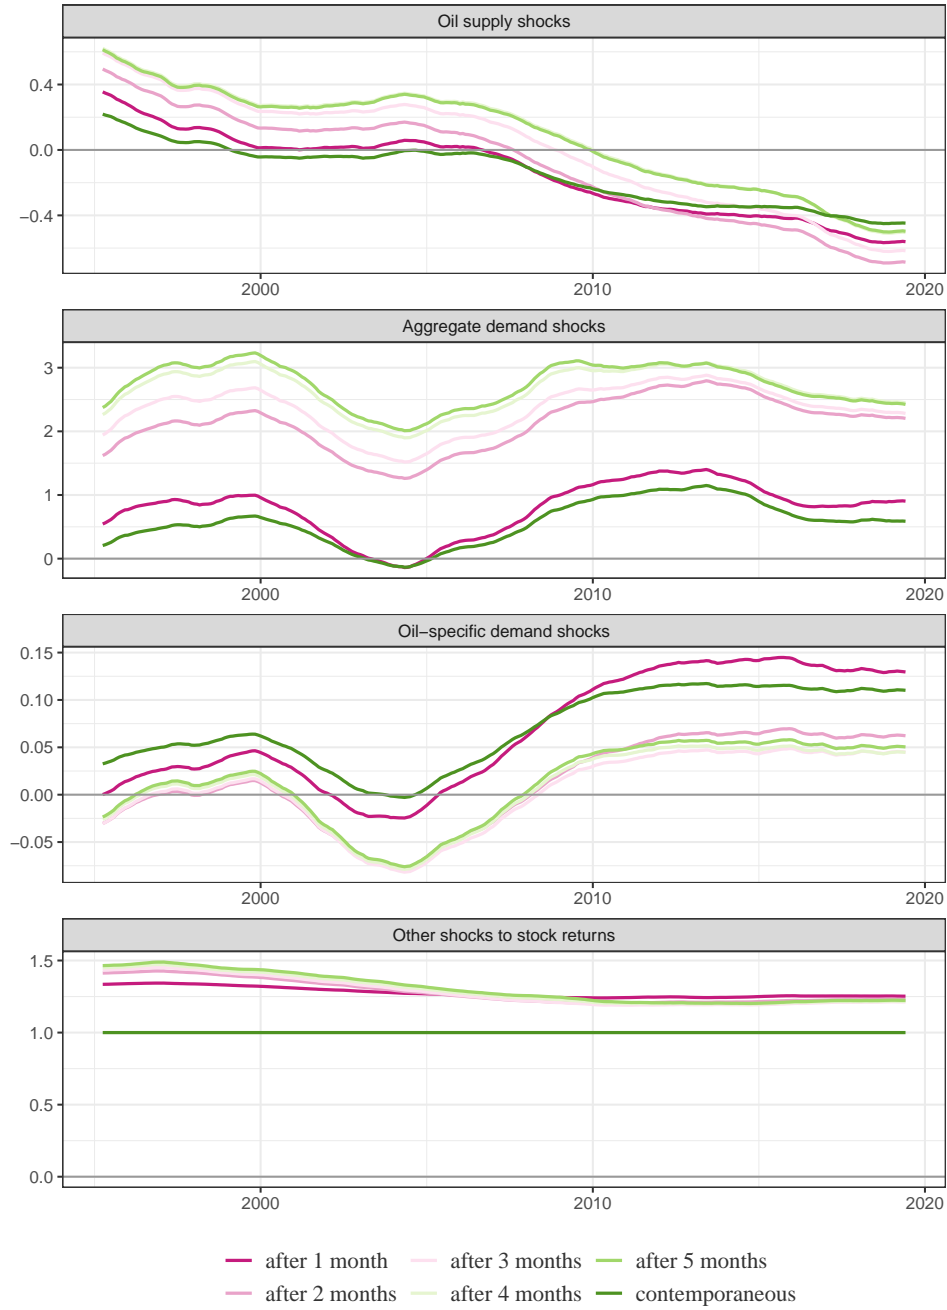



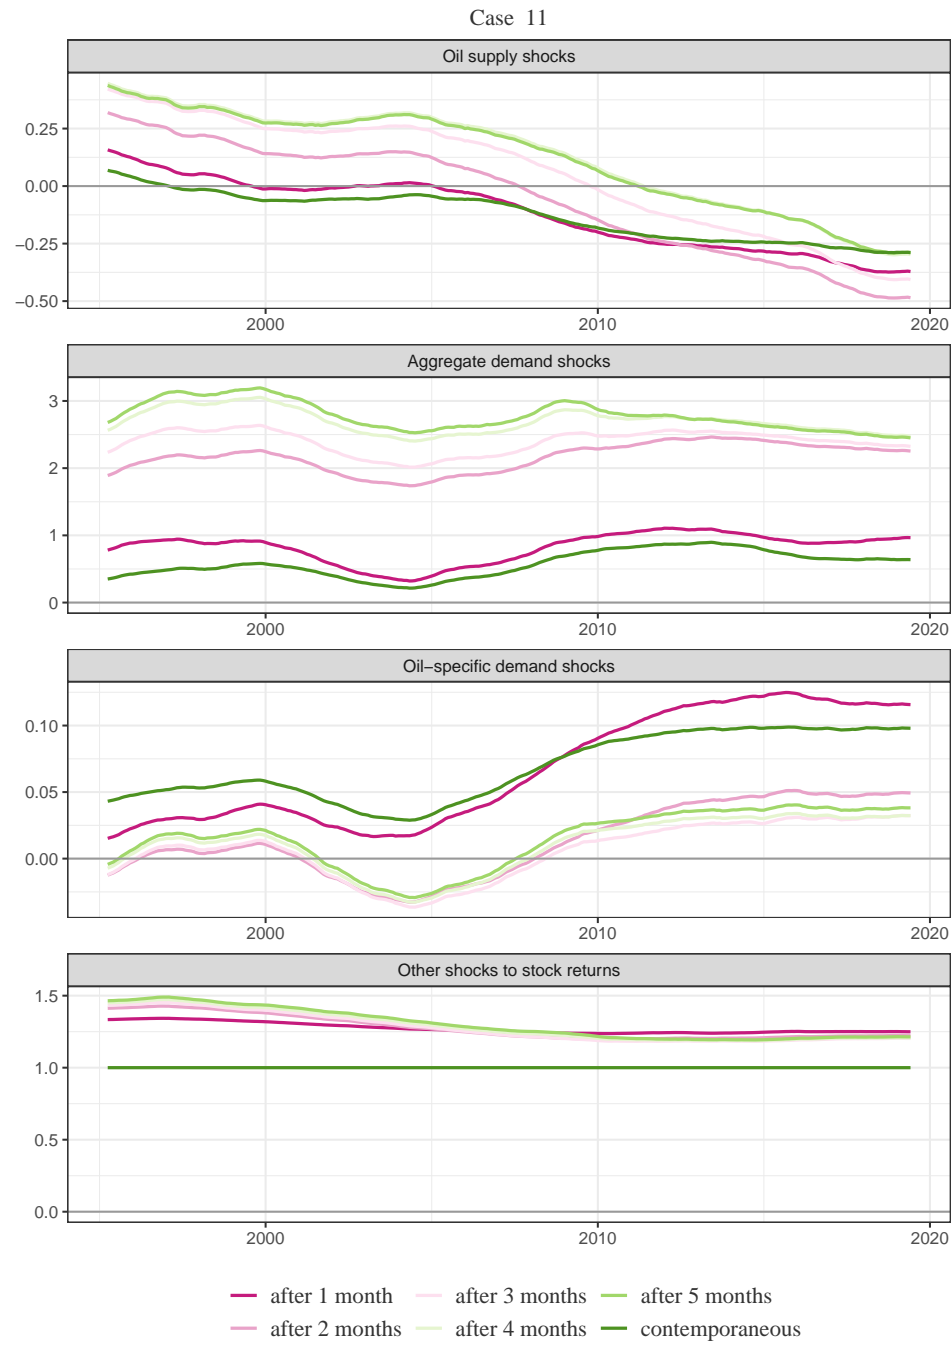

Case 12

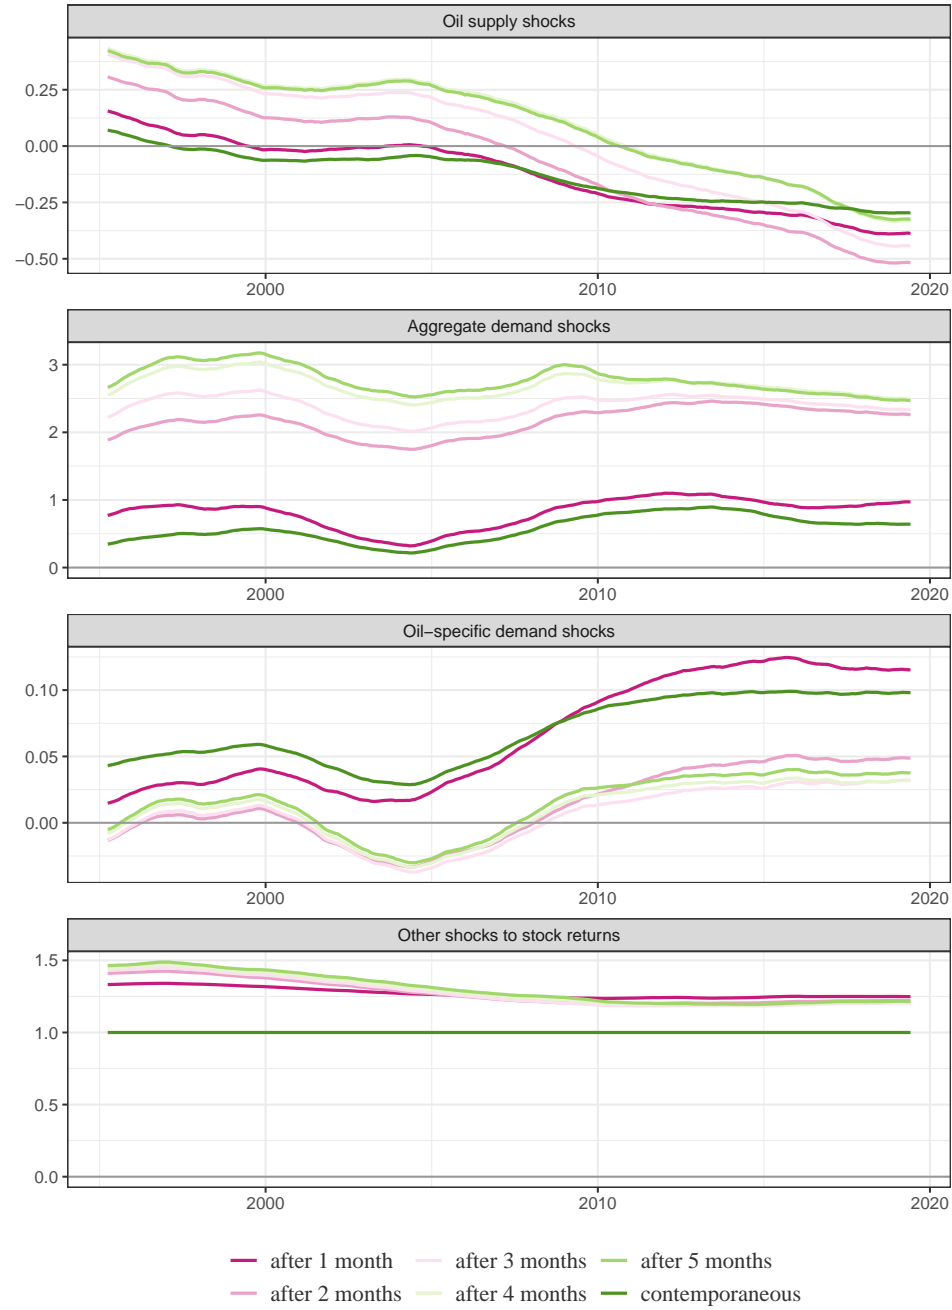

Case 13

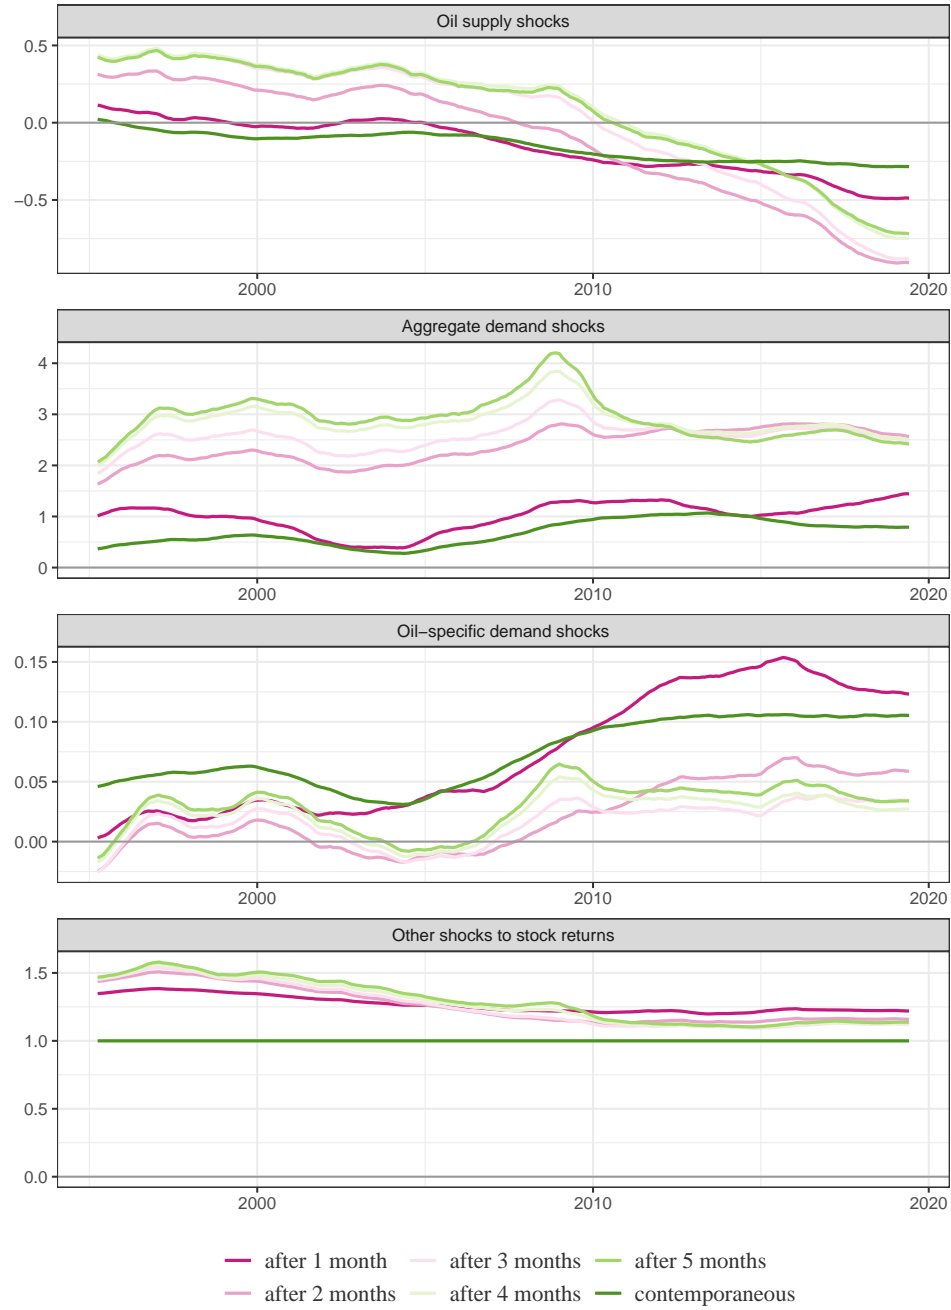

Case 14

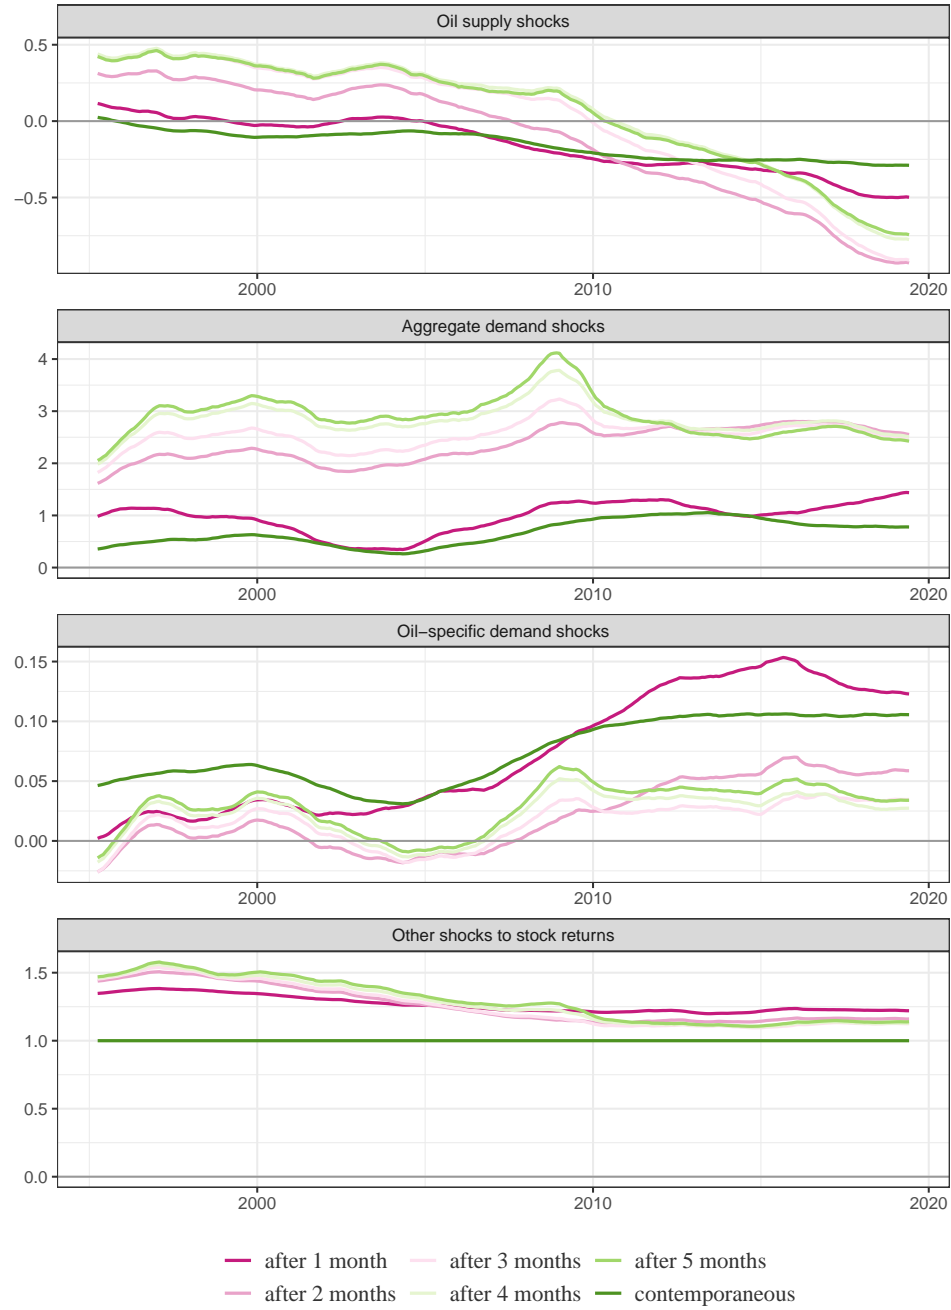

Case 15

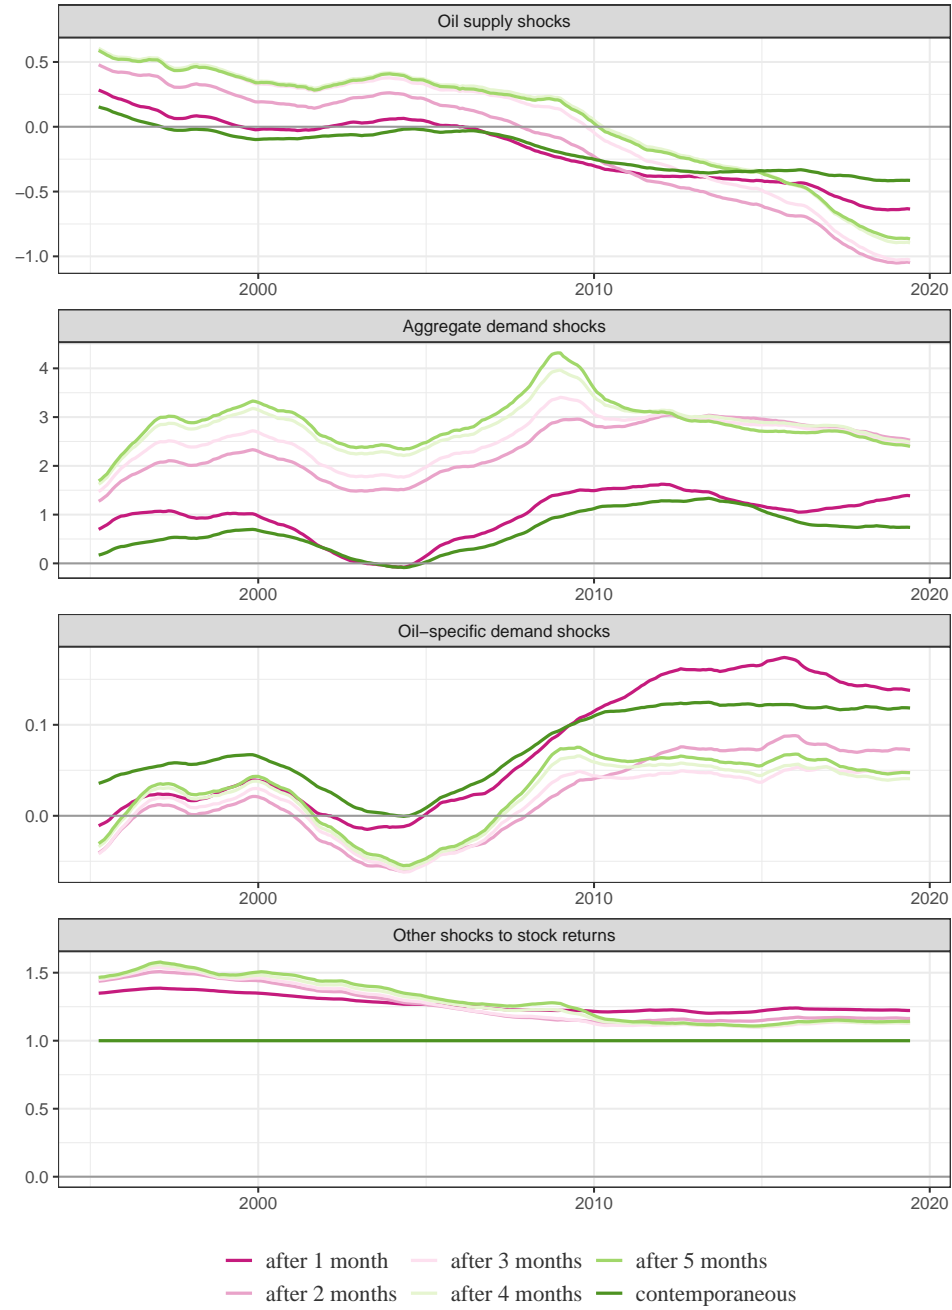

Case 16

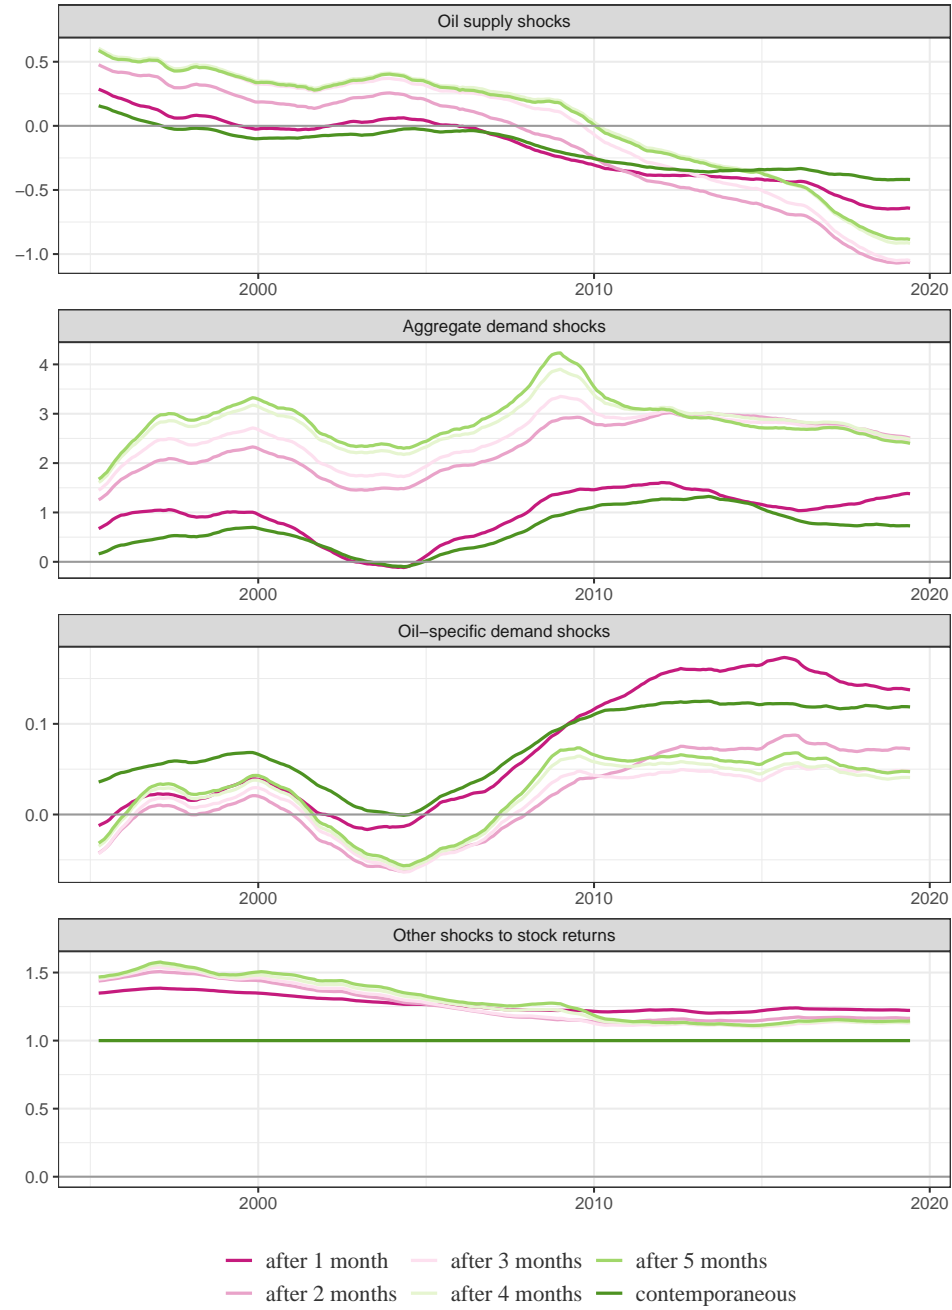

Case 17



Case 18





## References

Primiceri, G. E. (2005). Time varying structural vector autoregressions and monetary policy. *The Review of Economic Studies*, 72(3):821–852.
